# Supplementary material for: 2-Arylpropionic Acid Pyrazolamides as Cannabinoid CB2 Receptor Inverse Agonists Endowed with Anti-Inflammatory Properties
Source: MDPI journal article supplement (doi:10.3390/ph15121519), 2022-12-06
Supplement: s1 [file s1]

# **SUPPORTING INFORMATION**

## **2-Arylpropionic Acid Pyrazolamides as Cannabinoid CB2 Receptor Inverse Agonists Endowed with Anti-inflammatory Properties**

**Daniela R. de Oliveira <sup>2</sup>, Rodolfo C. Maia <sup>1</sup>, Patrícia R. de Carvalho <sup>2,3</sup>, Patrícia D. Fernandes <sup>2,3</sup>, Gisele Barbosa <sup>1,2</sup>, Lúcia M. Lima <sup>1,2</sup> and Carlos A. Manssour Fraga <sup>1,2,\*</sup>**

- <sup>1</sup> Laboratório de Avaliação e Síntese de Substâncias Bioativas, Instituto de Ciências Biomédicas, Universidade Federal do Rio de Janeiro, Rio de Janeiro, RJ, 21920-190, Brazil  
<sup>2</sup> Programa de Pós-Graduação em Farmacologia e Química Medicinal, Instituto de Ciências Biomédicas, Universidade Federal do Rio de Janeiro, Rio de Janeiro, RJ, 21920-190, Brazil  
<sup>3</sup> Laboratório da Dor e Inflamação, Instituto de Ciências Biomédicas, Universidade Federal do Rio de Janeiro, Rio de Janeiro, RJ, 21920-190, Brazil  
\* Correspondence: cmfraga@ccsdecania.ufrj.br

### **CONTENT:**

**FIGURES S1-S6:** Structural characterization of pyrazolamide (7);  
**FIGURES S7-S12:** Structural characterization of pyrazolamide (8);  
**FIGURES S13-S18:** Structural characterization of pyrazolamide (9);  
**FIGURES S19-S23:** Structural characterization of pyrazolamide (10);  
**FIGURES S24-S28:** Structural characterization of pyrazolamide (11);  
**FIGURES S29-S30:** Structural characterization of bismethylated pyrazolamide (16);  
**FIGURES S31-S32:** Alternative methodology tried for the synthesis pyrazolamide (12);  
**FIGURE S33:** Calibration curves for determination of aqueous solubility of the pyrazolamides (7-11);  
**FIGURE S34:** pH-Dependent chemical stability of pyrazolamides (7-11);  
**FIGURES S35-S36:** Absorbed fraction of drugs used as standard of GIT and BBB-PAMPA model and pyrazolamides (7-11);  
**FIGURES S35-S39:** Plasma stability profile of pyrazolamides (7-11);  
**Figure S40.** Dose-response curve of inverse agonism for cannabinoid receptor 2 (CB2) performed by the company Eurofins-CEREP: (A) control inverse agonist SR 144528 and (B) LASSBio-2265 (11).  
**Table S1.** Absorbed fraction of drugs used as standard and pyrazolamides (7-11) determined in the PAMPA-GTI model.  
**Table S2.** Permeability of drugs used as standard, and pyrazolamides (7-11) determined in the PAMPA-BBB model.  
**Table S3.** Evaluation the agonist effect against the CB1 receptors of the pyrazolamides (7-11).  
**Table S4.** Evaluation the agonist effect against the CB2 receptors of the pyrazolamides (7-11).  
**Table S5.** Raw data from the inverse agonism assay performed by the company Eurofins-CEREP

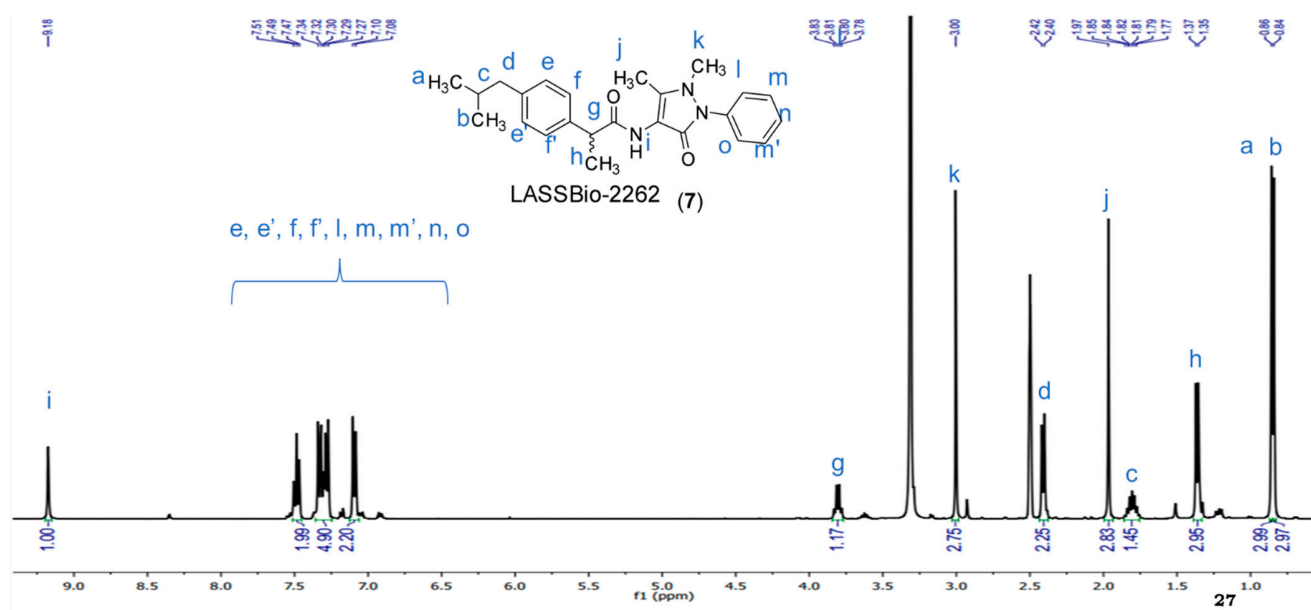

Figure S1. NMR spectrum<sup>1</sup>H pyrazolamide (7) (400 MHz, DMSO-d<sub>6</sub>).

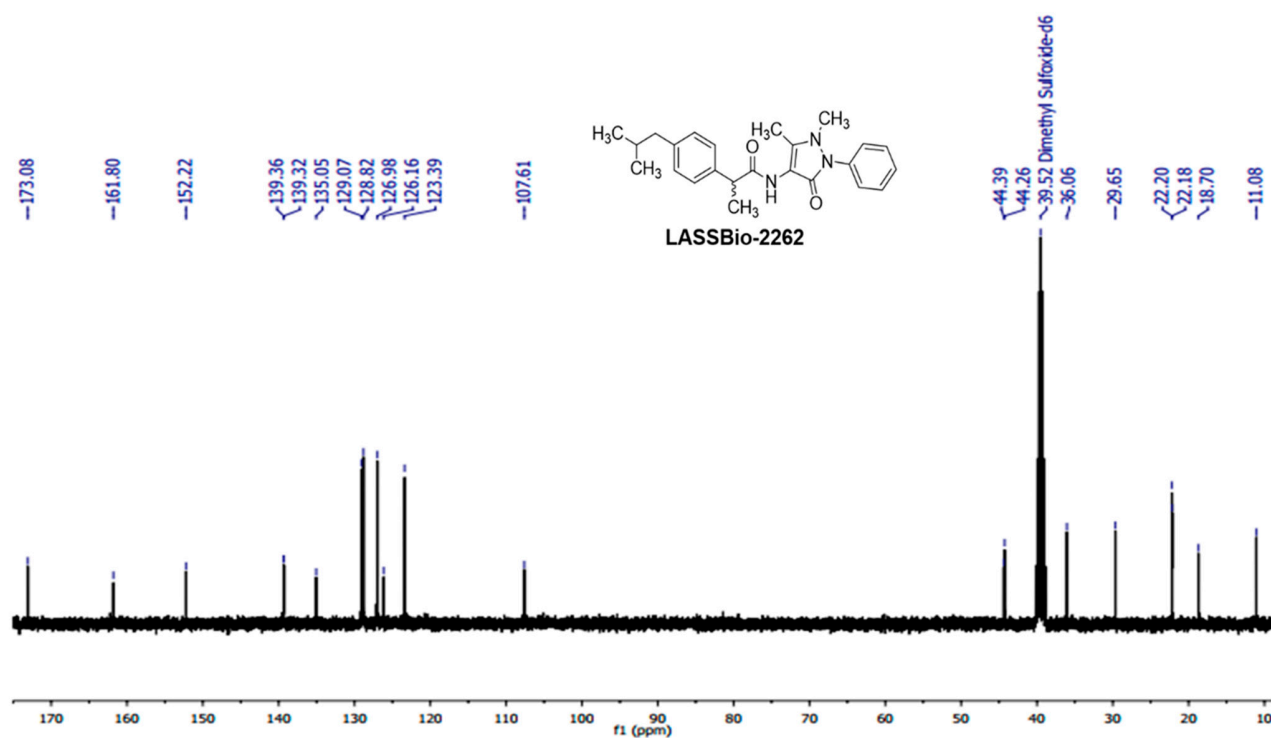

Figure S2. NMR spectrum<sup>13</sup>C pyrazolamide (7) (50 MHz, DMSO-d<sub>6</sub>).

<Chromatogram>

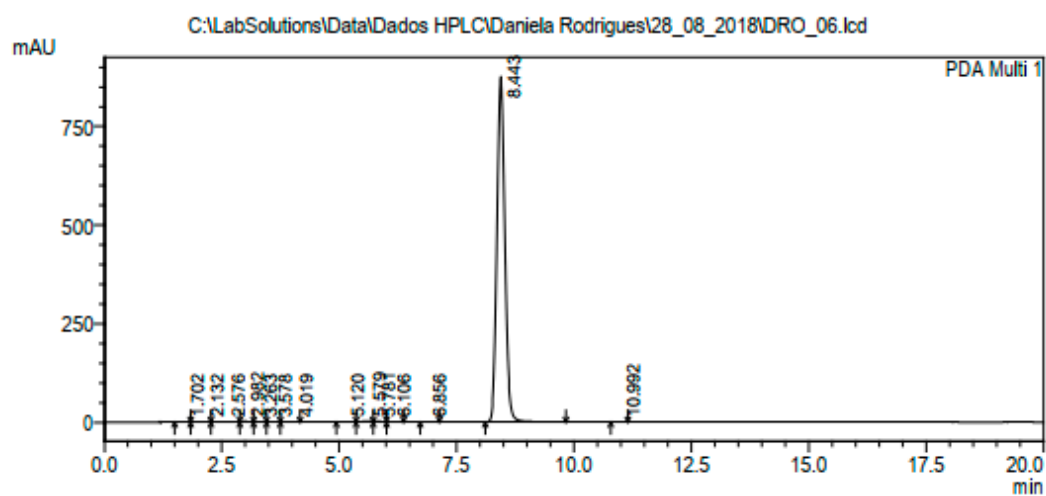

PeakTable

| Peak# | Ret. Time | Area     | Height | Area %  | Height % |
|-------|-----------|----------|--------|---------|----------|
| 1     | 1.702     | 2255     | 242    | 0.022   | 0.027    |
| 2     | 2.132     | 5585     | 381    | 0.053   | 0.043    |
| 3     | 2.576     | 23552    | 995    | 0.225   | 0.112    |
| 4     | 2.982     | 14976    | 1971   | 0.143   | 0.222    |
| 5     | 3.263     | 5984     | 618    | 0.057   | 0.070    |
| 6     | 3.578     | 6686     | 763    | 0.064   | 0.086    |
| 7     | 4.019     | 6444     | 594    | 0.062   | 0.067    |
| 8     | 5.120     | 6749     | 742    | 0.065   | 0.084    |
| 9     | 5.579     | 30122    | 2219   | 0.288   | 0.250    |
| 10    | 5.781     | 20791    | 1824   | 0.199   | 0.206    |
| 11    | 6.106     | 7340     | 705    | 0.070   | 0.079    |
| 12    | 6.856     | 1699     | 169    | 0.016   | 0.019    |
| 13    | 8.443     | 10316978 | 875693 | 98.709  | 98.712   |
| 14    | 10.992    | 2705     | 203    | 0.026   | 0.023    |
| Total |           | 10451867 | 887119 | 100.000 | 100.000  |

**Figure S3.** Chromatogram obtained for pyrazolamide (**7**). Conditions: Shimadzu – LC20AD; Column: Kromasil 100-5 C18 250-4.6 mm; Mobile phase: 60% ACN, 40% water; Flow: 1mL/min; Detector: SPD-M20A (Diode Array); Wavelength: 271 nm.

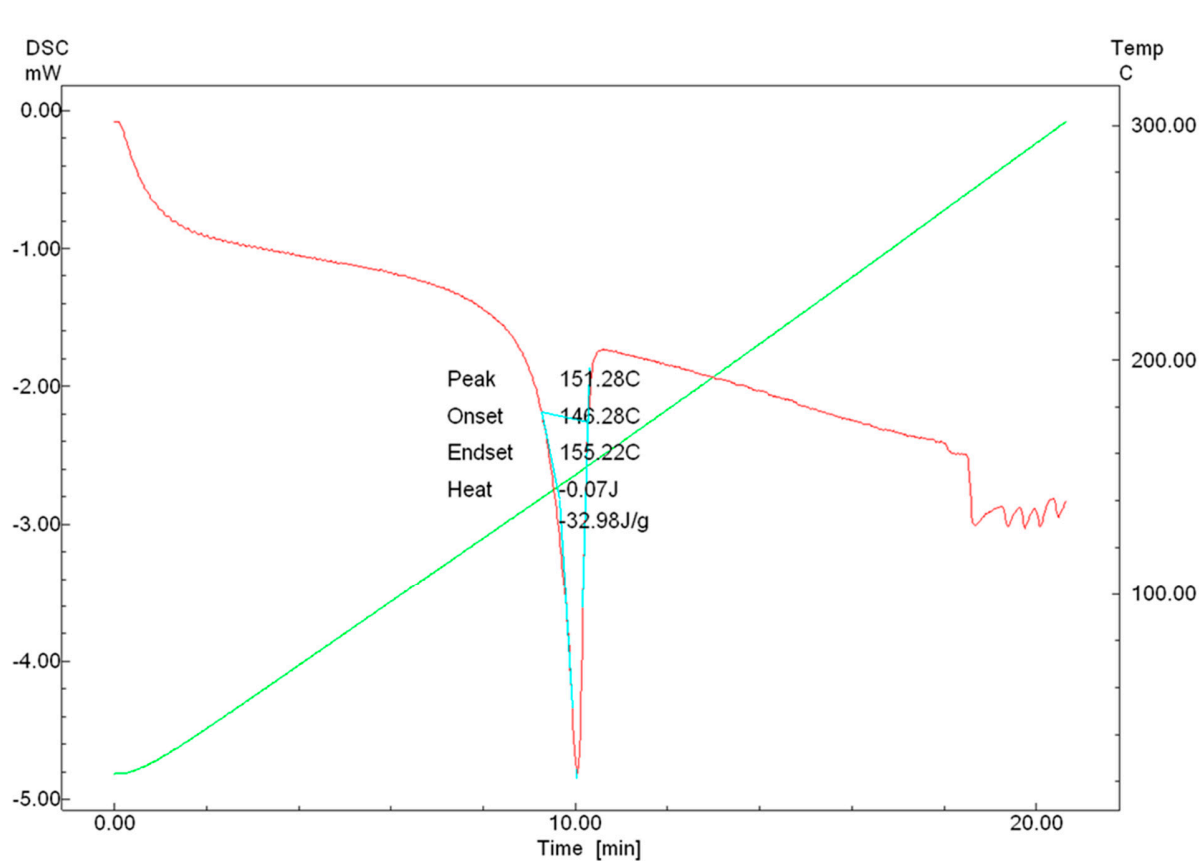

**Figure S4.** Determination of the melting point (FP) of pyrazolamide (7) determined by *Differential Scanning Calorimetry* (DSC) performed in a Shimadzu equipment (Model DSC-60).

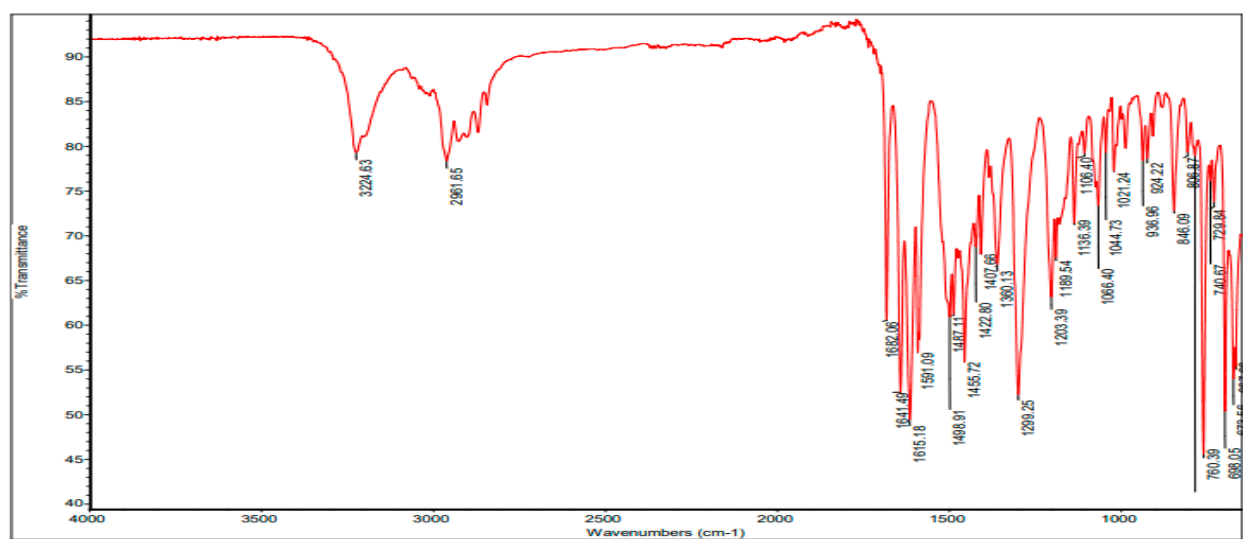

**Figure S5.** Infrared (ATR) of pyrazolamide (7).

DAN 05 #1579-1591 RT: 7.67-7.70 AV: 2 NL: 3.23E9  
T: FTMS + p ESI Full ms [60.0000-820.0000]

$[M+H]^+$  (calculated): 392.23325

$[M+H]^+$  (experimental): 392.23268

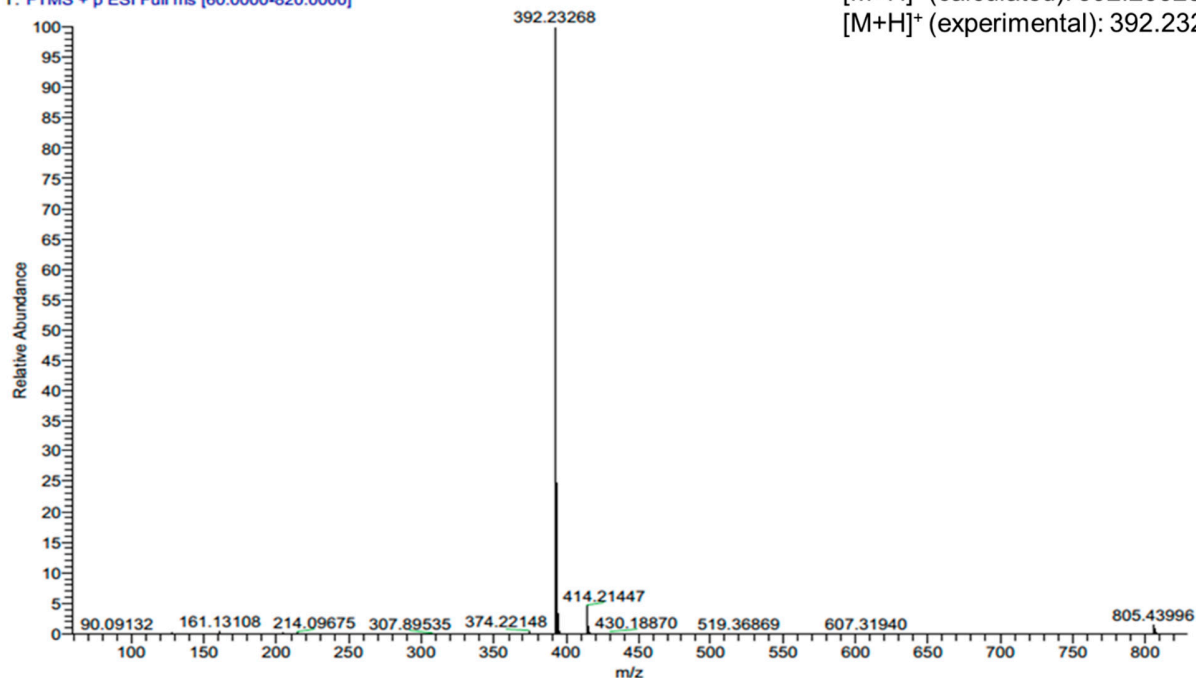

Figure S6. High resolution mass spectrum of pyrazolamide (7). Detection in positive mode ( $[M+H]^+$ ).

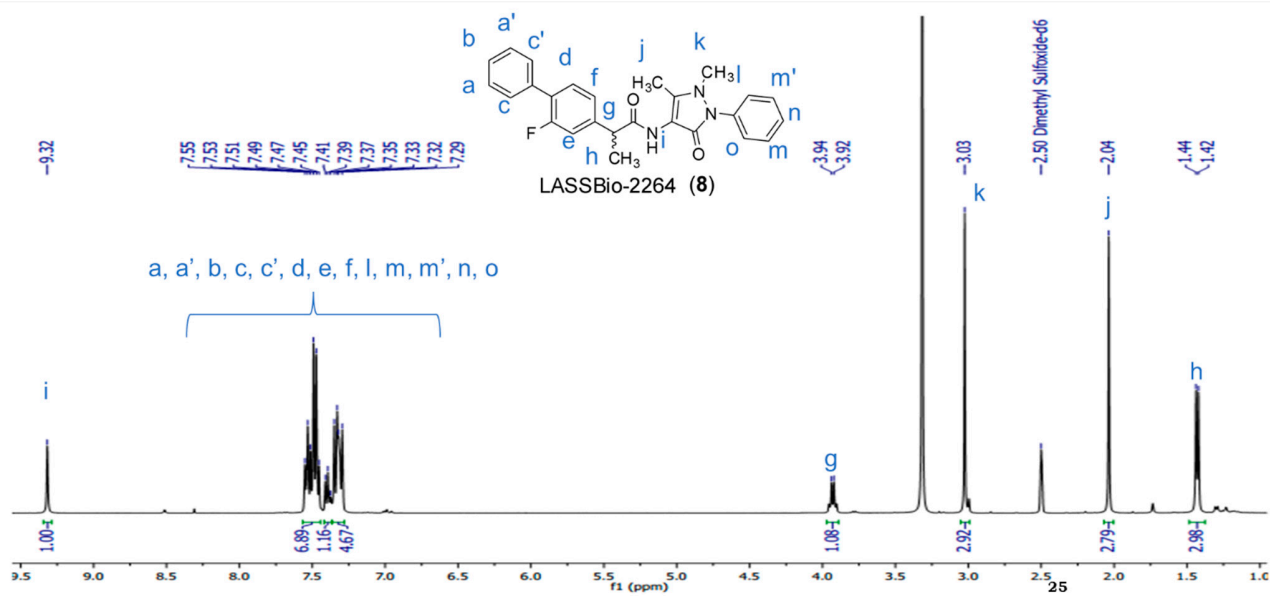

Figure S7.  $^1\text{H}$  NMR spectrum of pyrazolamide (8) (400 MHz,  $\text{DMSO-d}_6$ ).

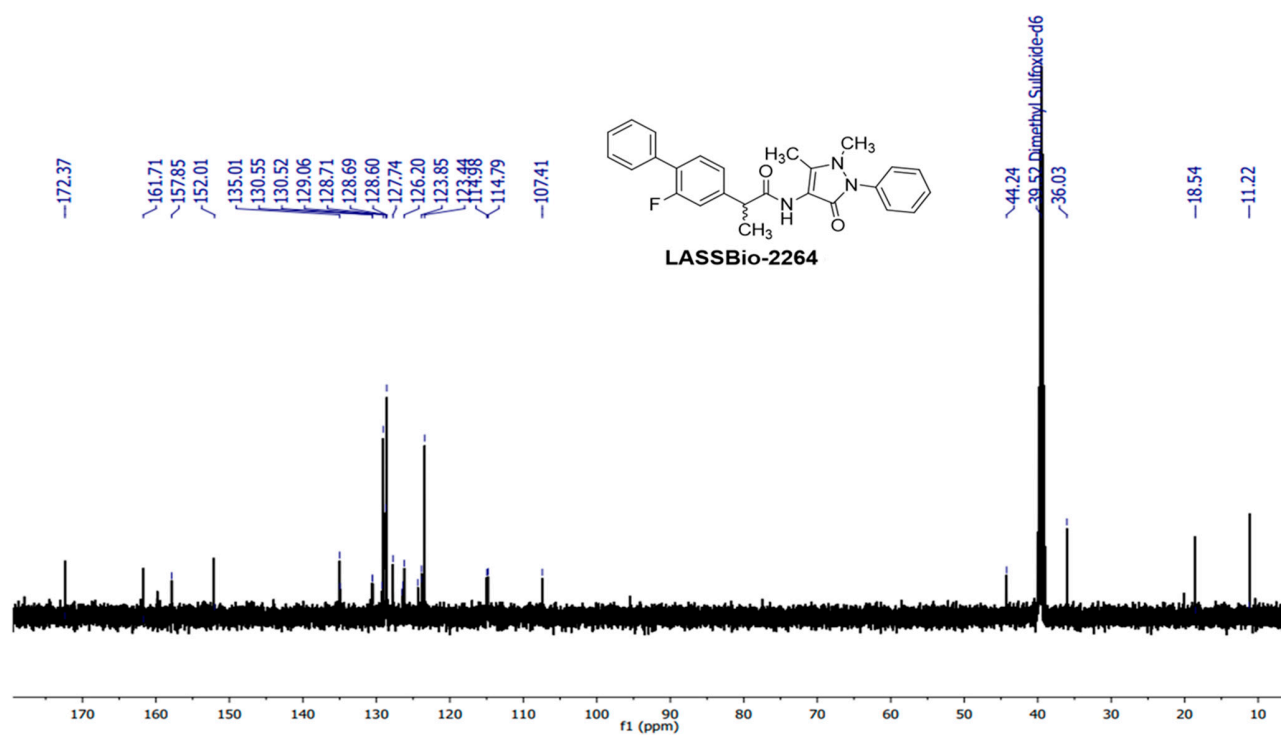

**Figure S8.** NMR spectrum <sup>13</sup>C pyrazolamide (**8**) (50 MHz, DMSO-d<sub>6</sub>).

<Chromatogram>

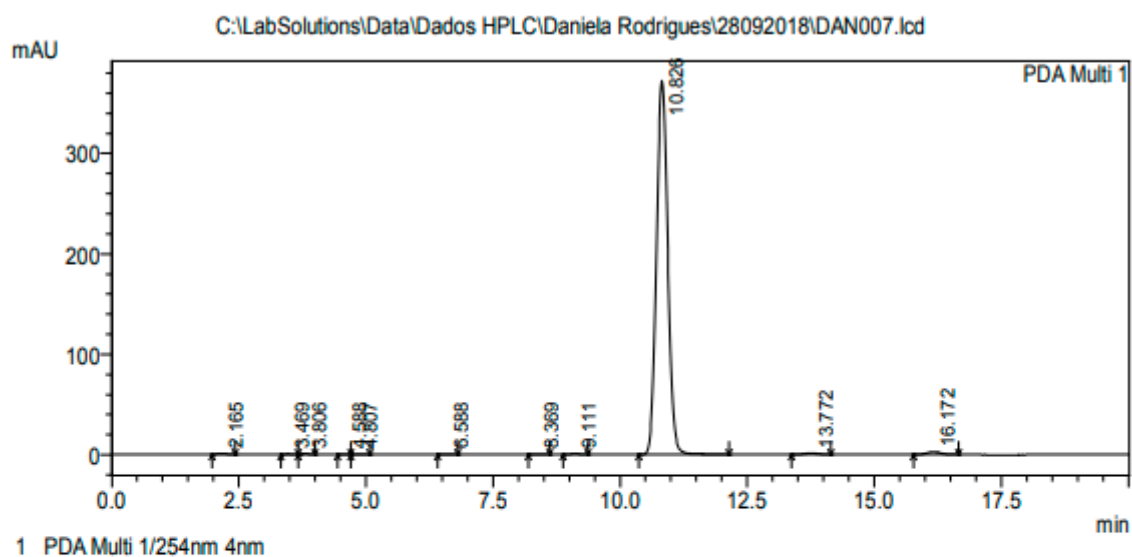

PeakTable

PDA Ch1 254nm 4nm

| Peak# | Ret. Time | Area    | Height | Area %  | Height % |
|-------|-----------|---------|--------|---------|----------|
| 1     | 2.165     | 10192   | 740    | 0.174   | 0.195    |
| 2     | 3.469     | 3409    | 474    | 0.058   | 0.125    |
| 3     | 3.806     | 6968    | 964    | 0.119   | 0.254    |
| 4     | 4.588     | 1115    | 148    | 0.019   | 0.039    |
| 5     | 4.807     | 2137    | 222    | 0.036   | 0.059    |
| 6     | 6.588     | 3410    | 321    | 0.058   | 0.085    |
| 7     | 8.369     | 2188    | 179    | 0.037   | 0.047    |
| 8     | 9.111     | 9907    | 766    | 0.169   | 0.202    |
| 9     | 10.826    | 5757577 | 371270 | 98.024  | 97.920   |
| 10    | 13.772    | 24467   | 1332   | 0.417   | 0.351    |
| 11    | 16.172    | 52283   | 2740   | 0.890   | 0.723    |
| Total |           | 5873653 | 379155 | 100.000 | 100.000  |

**Figure S9.** Chromatogram obtained for **pyrazolamide** (8). Conditions: Shimadzu – LC20AD; Column: Kromasil 100-5 C18 250-4.6 mm; Mobile phase: 60% ACN, 40% water; Flow: 1mL/min; Detector: SPD-M20A (Diode Array); Wavelength: 254 nm.

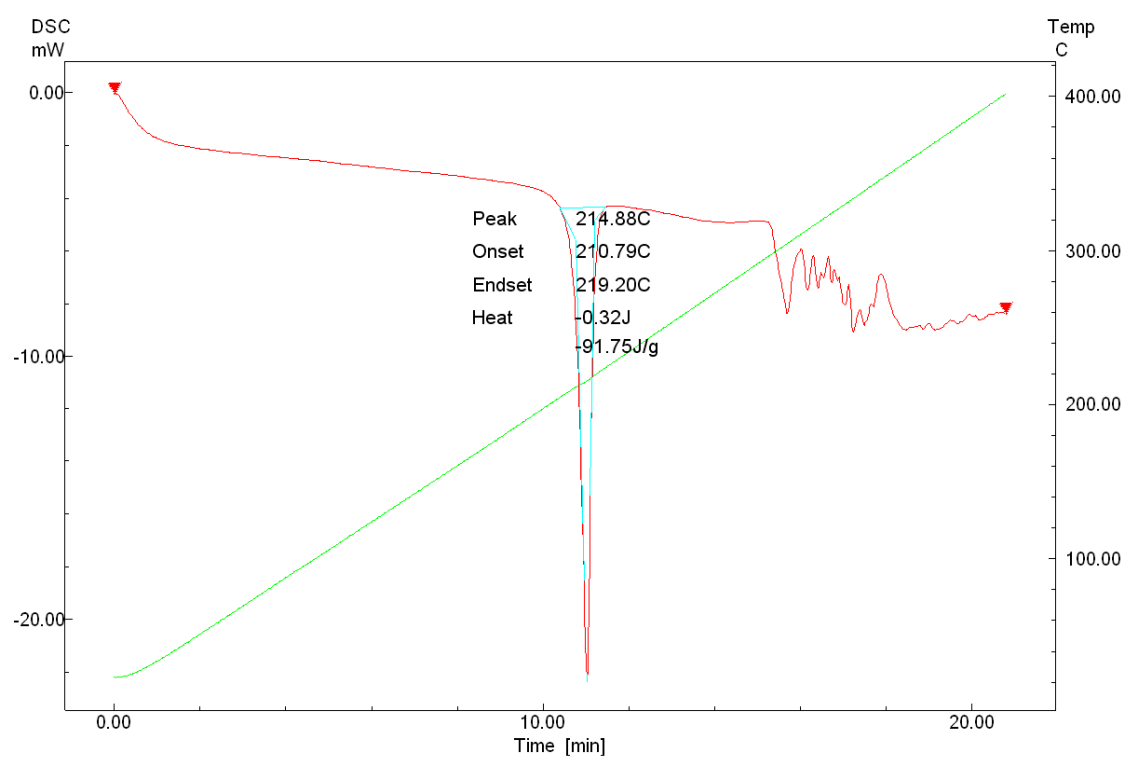

**Figure S10.** Determination of the melting point (FP) of pyrazolamide (**8**) determined by *Differential Scanning Calorimetry* (DSC) performed in a Shimadzu equipment (Model DSC-60).



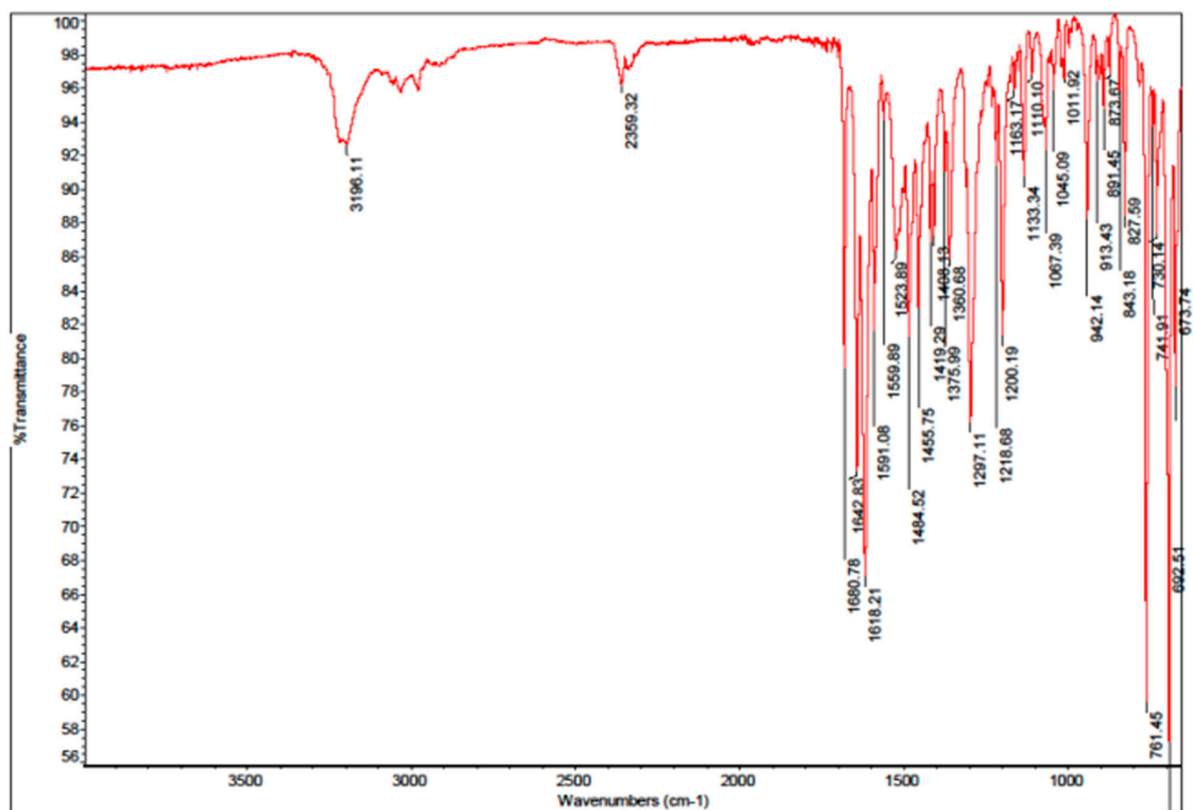

Figure S11. Infrared (ATR) of pyrazolamide (8).

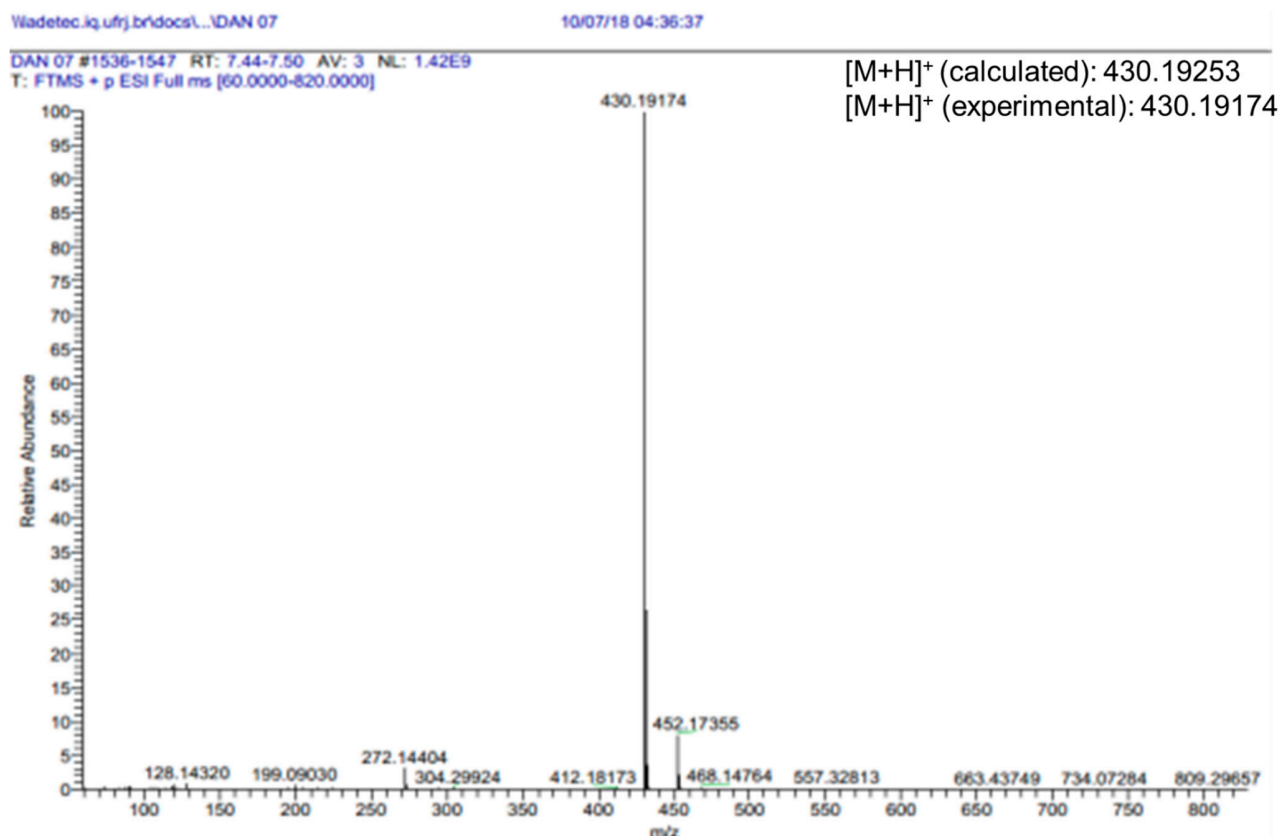

**Figure S12.** High resolution mass spectrum of pyrazolamide (8). Detection in positive mode ([M+H]<sup>+</sup>).

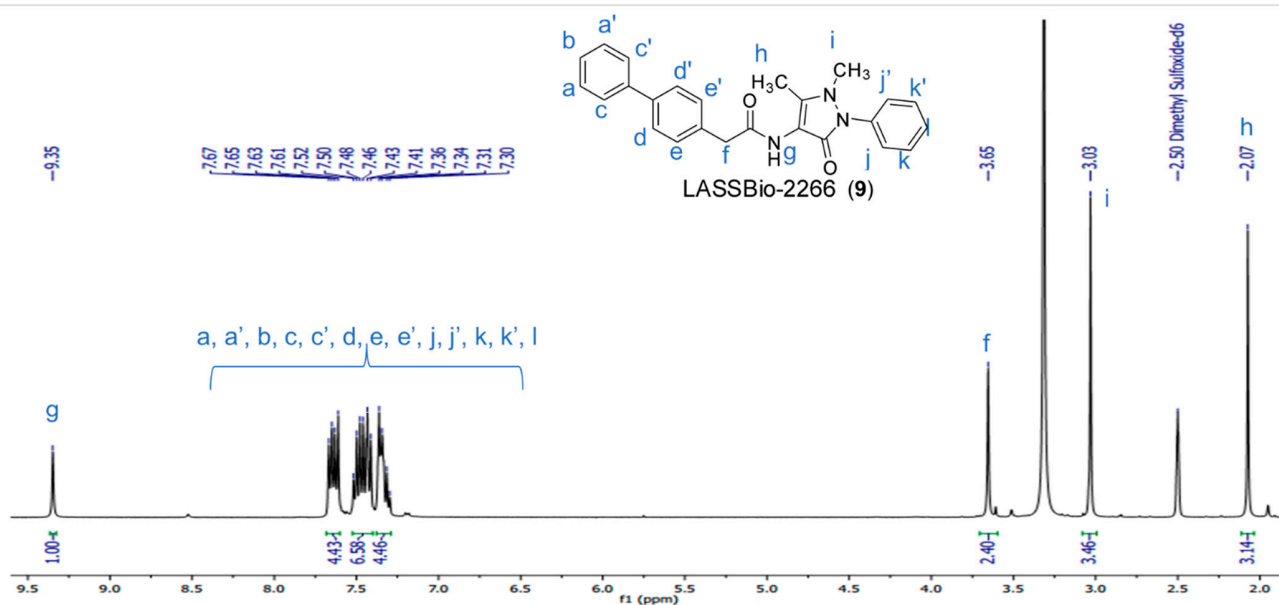

**Figure S13.** Spectrum <sup>1</sup>H NMR pyrazolamide (9) (400 MHz, DMSO-d<sub>6</sub>).

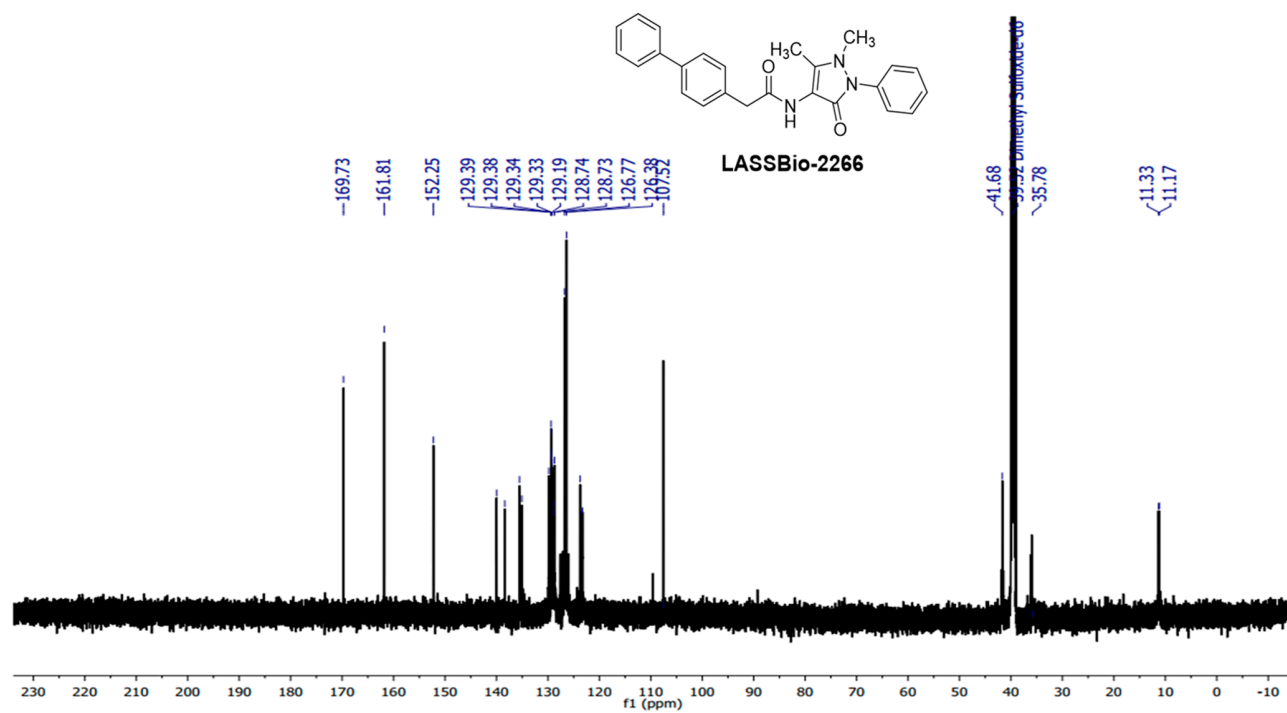

**Figure S14.** Spectrum  $^{13}\text{C}$  NMR pyrazolamide (**9**) (50 MHz, DMSO- $d_6$ ).

<Chromatogram>

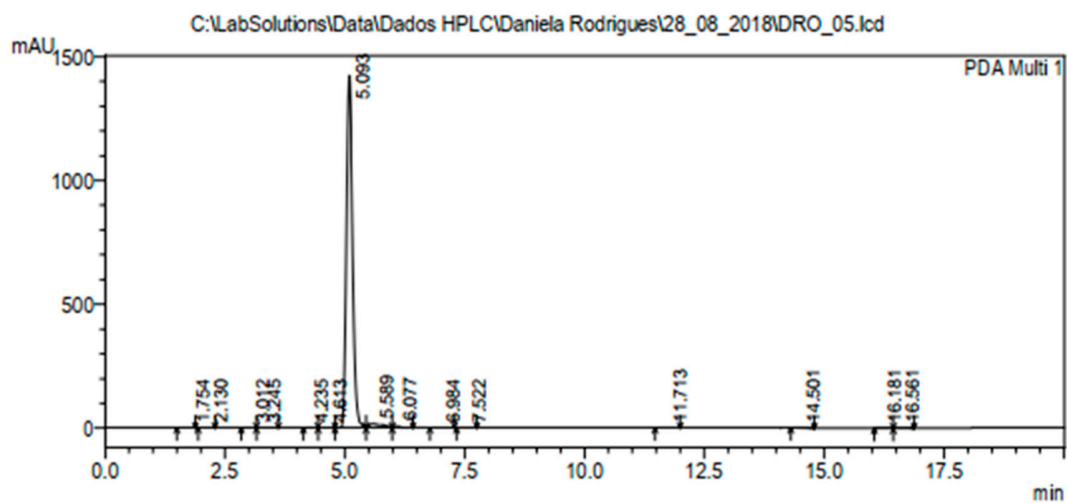

PeakTable

| Peak# | Ret. Time | Area     | Height  | Area %  | Height % |
|-------|-----------|----------|---------|---------|----------|
| 1     | 1.754     | 2871     | 492     | 0.022   | 0.034    |
| 2     | 2.130     | 3414     | 299     | 0.027   | 0.021    |
| 3     | 3.012     | 4384     | 372     | 0.034   | 0.026    |
| 4     | 3.245     | 6721     | 765     | 0.052   | 0.053    |
| 5     | 4.235     | 1421     | 111     | 0.011   | 0.008    |
| 6     | 4.613     | 2185     | 212     | 0.017   | 0.015    |
| 7     | 5.093     | 12443500 | 1423276 | 96.605  | 98.228   |
| 8     | 5.589     | 335900   | 15853   | 2.608   | 1.094    |
| 9     | 6.077     | 50987    | 5034    | 0.396   | 0.347    |
| 10    | 6.984     | 14408    | 1414    | 0.112   | 0.098    |
| 11    | 7.522     | 3283     | 312     | 0.025   | 0.022    |
| 12    | 11.713    | 4971     | 373     | 0.039   | 0.026    |
| 13    | 14.501    | 2567     | 176     | 0.020   | 0.012    |
| 14    | 16.181    | 1723     | 95      | 0.013   | 0.007    |
| 15    | 16.561    | 2521     | 166     | 0.020   | 0.011    |
| Total |           | 12880854 | 1448949 | 100.000 | 100.000  |

**Figure S15.** Chromatogram obtained for pyrazolamide (9). Conditions: Shimadzu – LC20AD; Column: Kromasil 100-5 C18 250-4.6 mm; Mobile phase: 60% ACN, 40% water; Flow: 1mL/min; Detector: SPD-M20A (Diode Array); Wavelength: 254 nm.

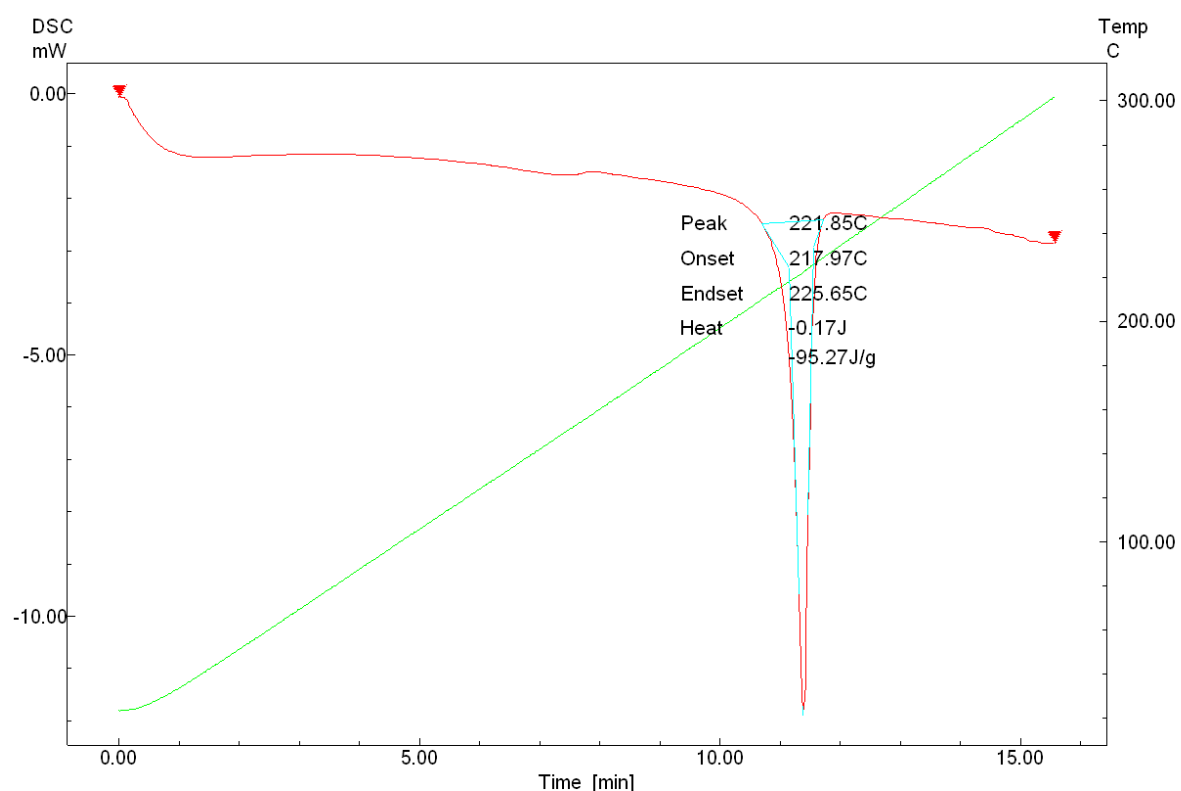

**Figure S16.** Determination of the melting point (FP) of pyrazolamide (**9**) determined by *Differential Scanning Calorimetry* (DSC) performed in a Shimadzu equipment (Model DSC-60).

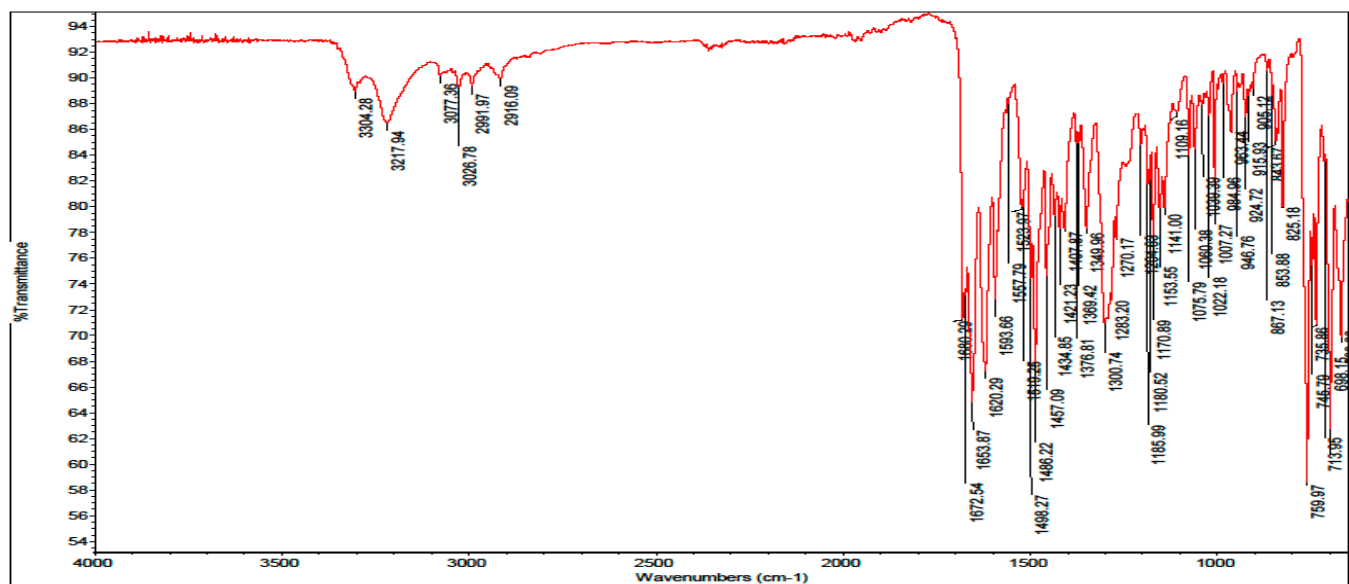

**Figure S17.** Infrared (ATR) pyrazolamide (**9**).

DAN 01 #1453-1471 RT: 7.03-7.08 AV: 3 NL: 1.03E9  
T: FTMS + p ESI Full ms [60.0000-820.0000]

$[M+H]^+$  (calculated): 398.18630

$[M+H]^+$  (experimental): 398.18582

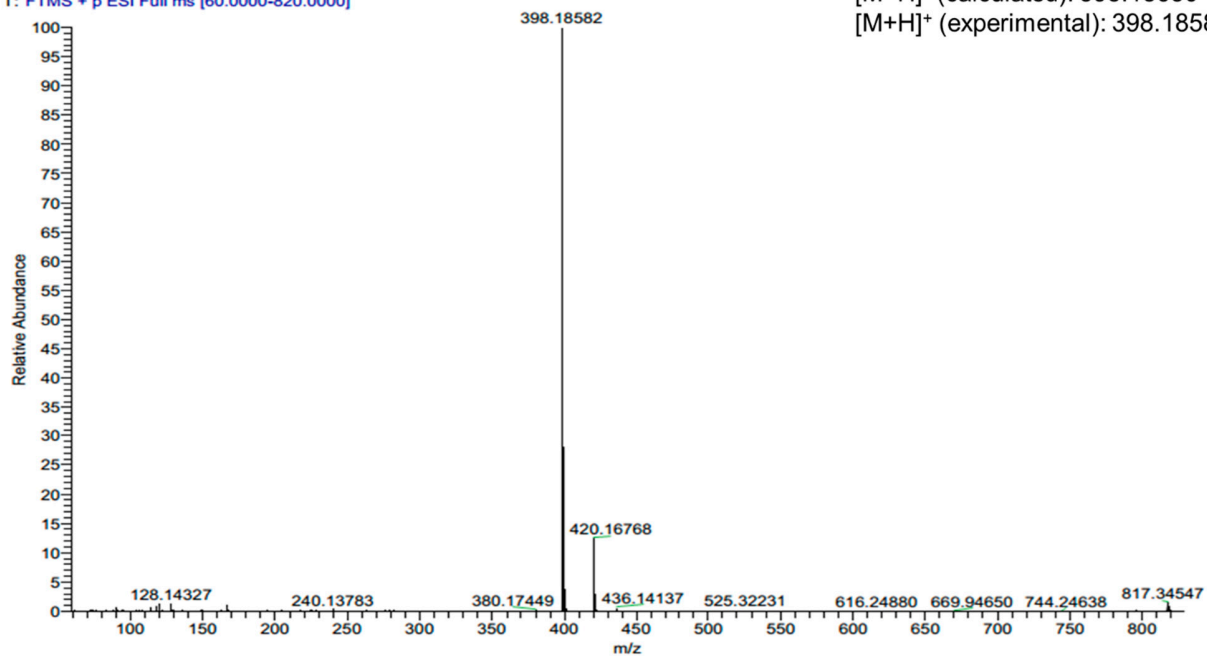

**Figure S18.** High resolution mass spectrum of pyrazolamide (**9**). Detection in positive mode ( $[M+H]^+$ ).

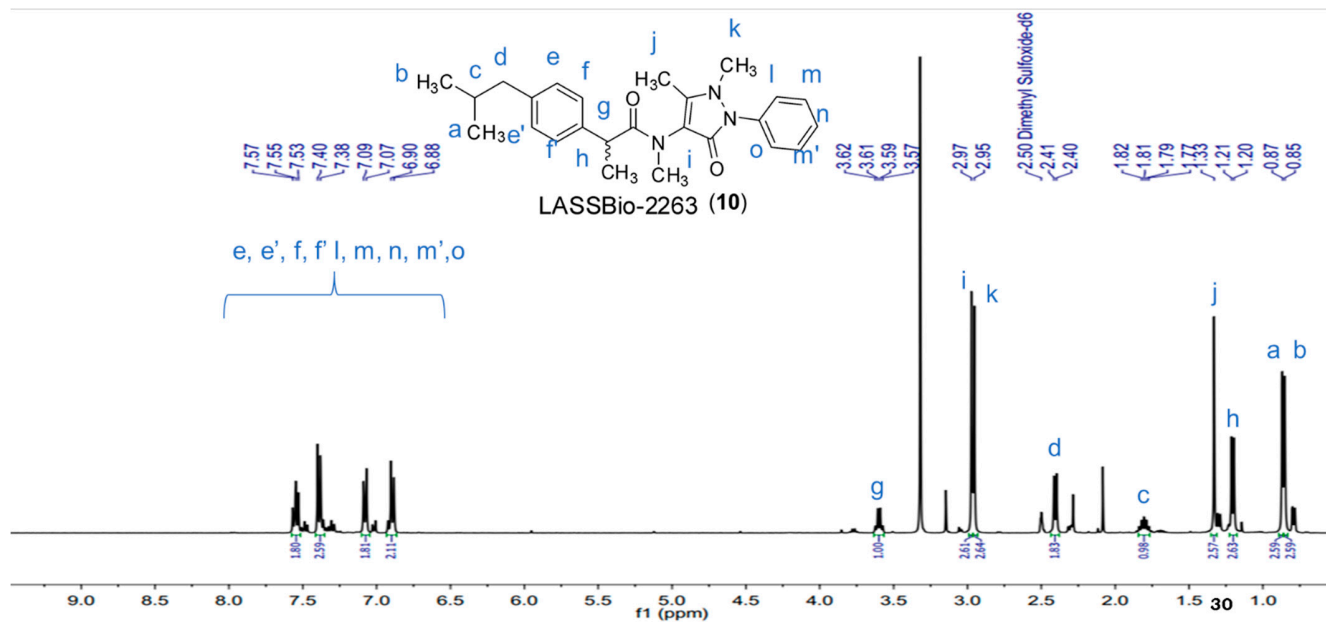

Figure S19.  $^1\text{H}$  NMR spectrum of pyrazolamide (10) (400 MHz, DMSO- $\text{d}_6$ ).

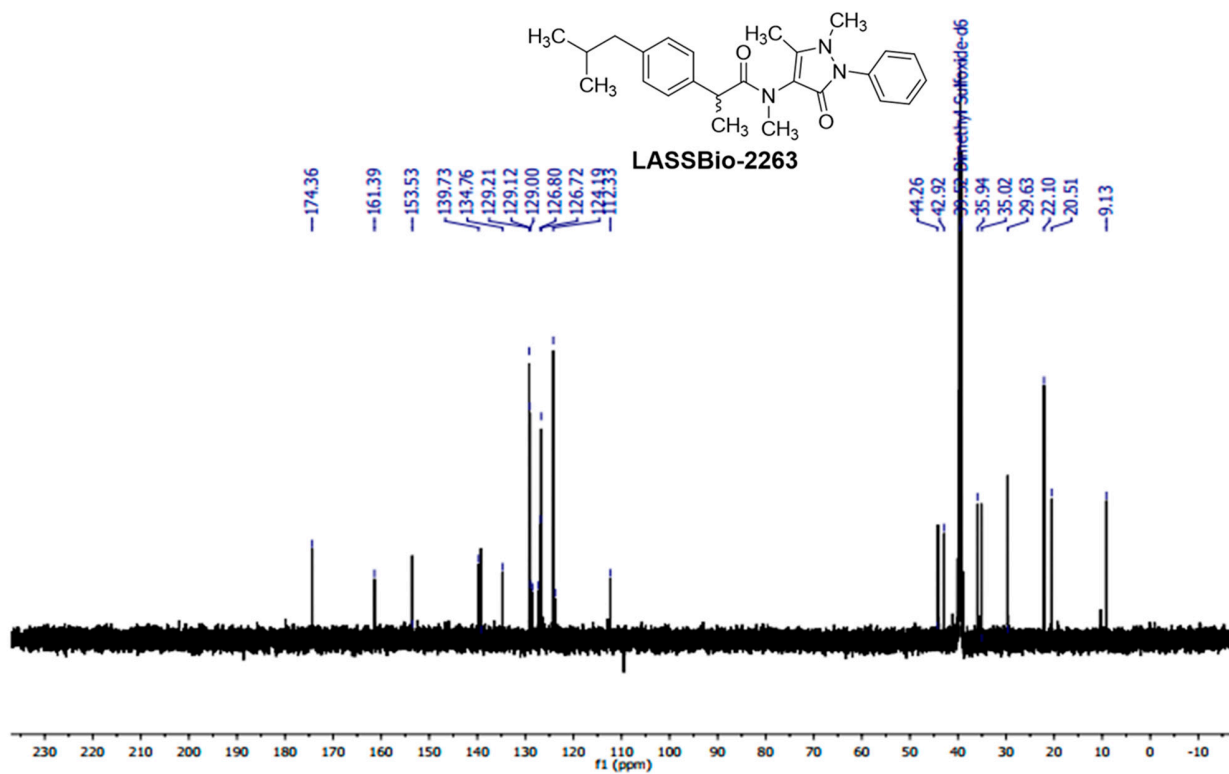

Figure S20. NMR spectrum  $^{13}\text{C}$  of pyrazolamide (10) (50 MHz, DMSO- $\text{d}_6$ ).

<Chromatogram>

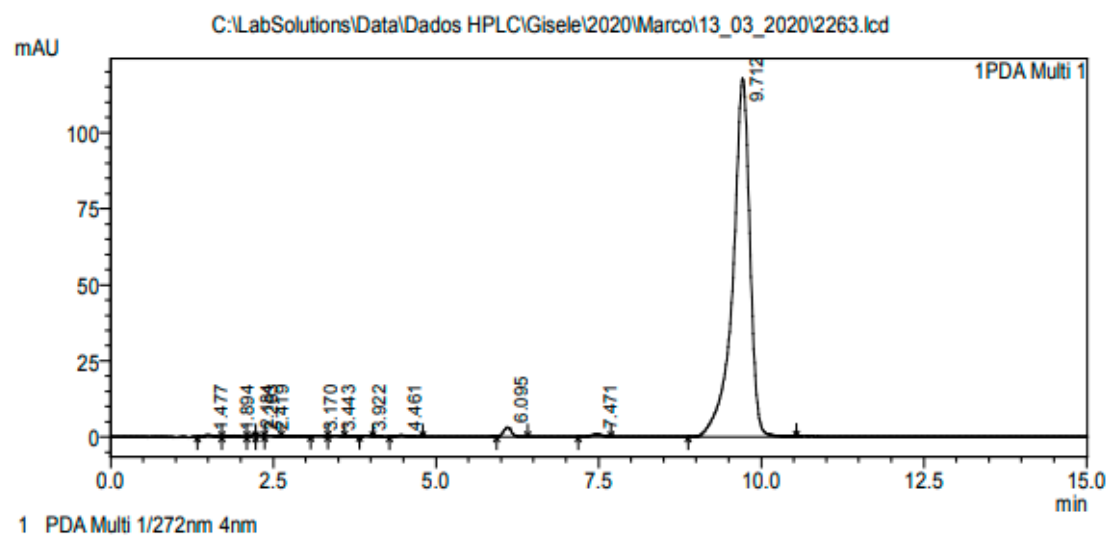

PeakTable

| Peak# | Ret. Time | Area    | Height | Area %  | Height % |
|-------|-----------|---------|--------|---------|----------|
| 1     | 1.477     | 5457    | 600    | 0.248   | 0.479    |
| 2     | 1.894     | 2871    | 293    | 0.130   | 0.234    |
| 3     | 2.184     | 2958    | 901    | 0.134   | 0.719    |
| 4     | 2.263     | 3140    | 583    | 0.143   | 0.465    |
| 5     | 2.419     | 1917    | 221    | 0.087   | 0.177    |
| 6     | 3.170     | 2023    | 202    | 0.092   | 0.161    |
| 7     | 3.443     | 1637    | 239    | 0.074   | 0.191    |
| 8     | 3.922     | 2200    | 350    | 0.100   | 0.279    |
| 9     | 4.461     | 4727    | 416    | 0.215   | 0.332    |
| 10    | 6.095     | 26490   | 3082   | 1.204   | 2.460    |
| 11    | 7.471     | 9913    | 815    | 0.451   | 0.650    |
| 12    | 9.712     | 2136763 | 117604 | 97.121  | 93.854   |
| Total |           | 2200096 | 125305 | 100.000 | 100.000  |

**Figure S21.** Chromatogram obtained for pyrazolamide (**10**). Conditions: Shimadzu – LC20AD; Column: Kromasil 100-5 C18 250-4.6 mm; Mobile phase: 60% ACN, 40% water; Flow: 1mL/min; Detector: SPD-M20A (Diode Array); Wavelength: 272 nm.



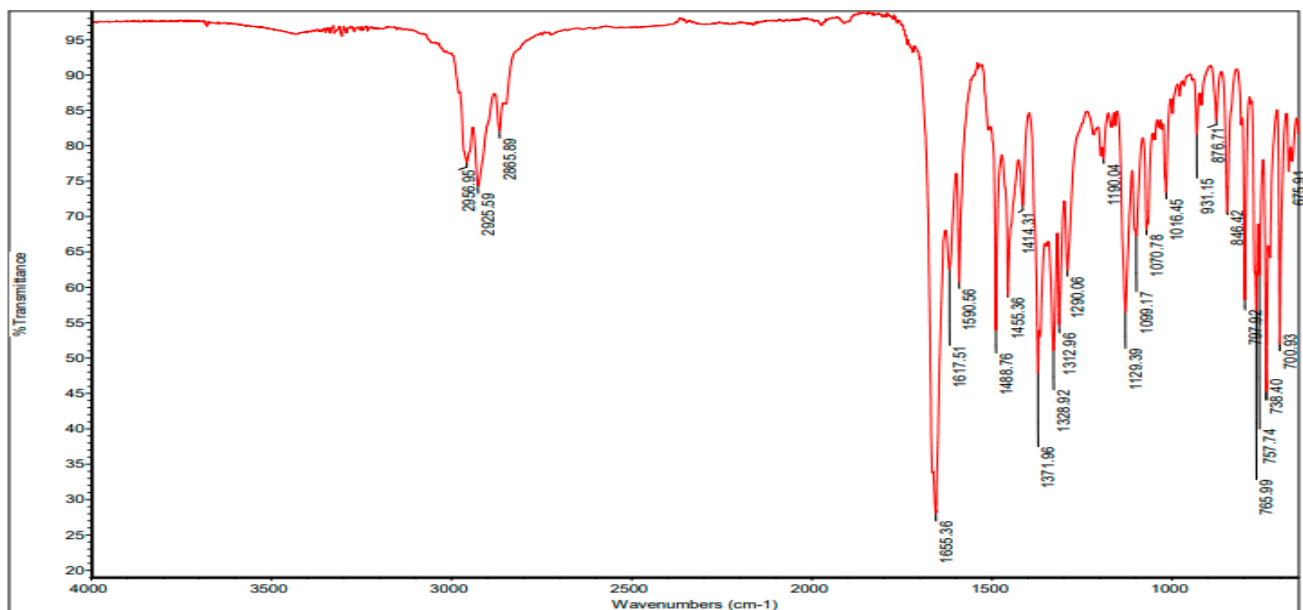

Figure S22. Infrared (ATR) pyrazolamide (10).

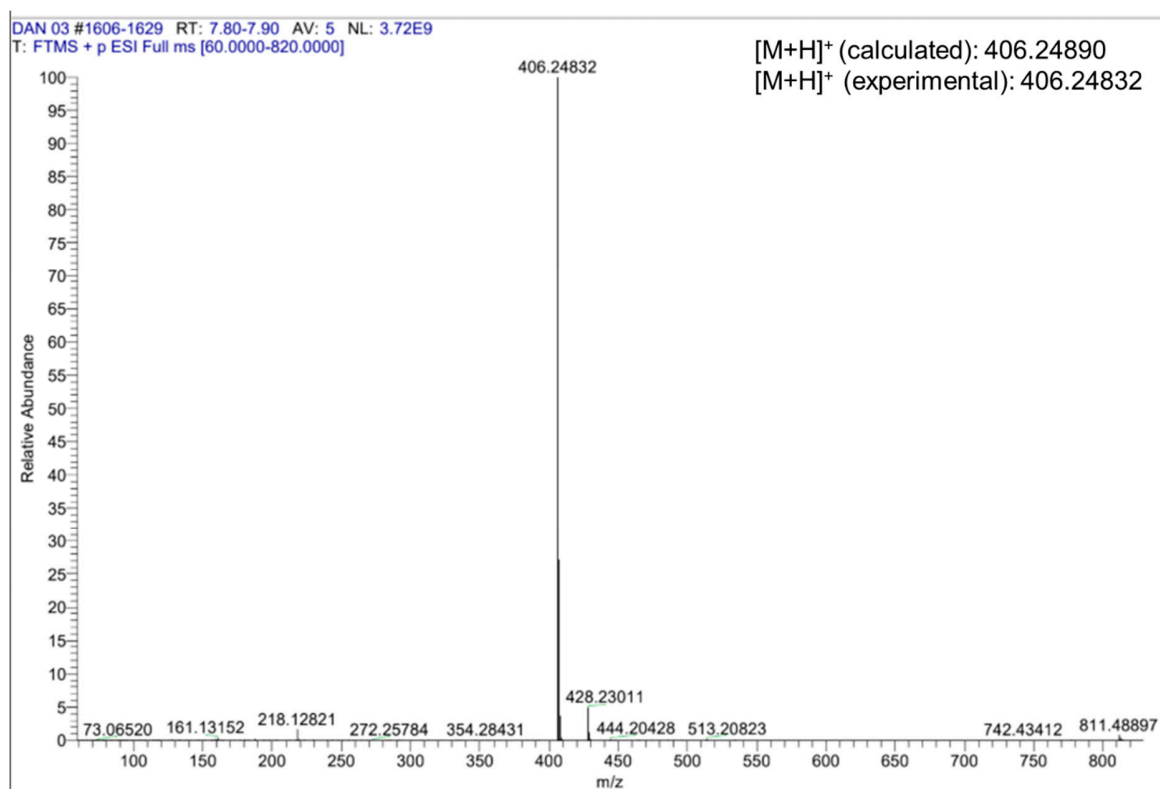

Figure S23. High resolution mass spectrum of pyrazolamide (10). Detection in positive mode ([M+H]<sup>+</sup>).

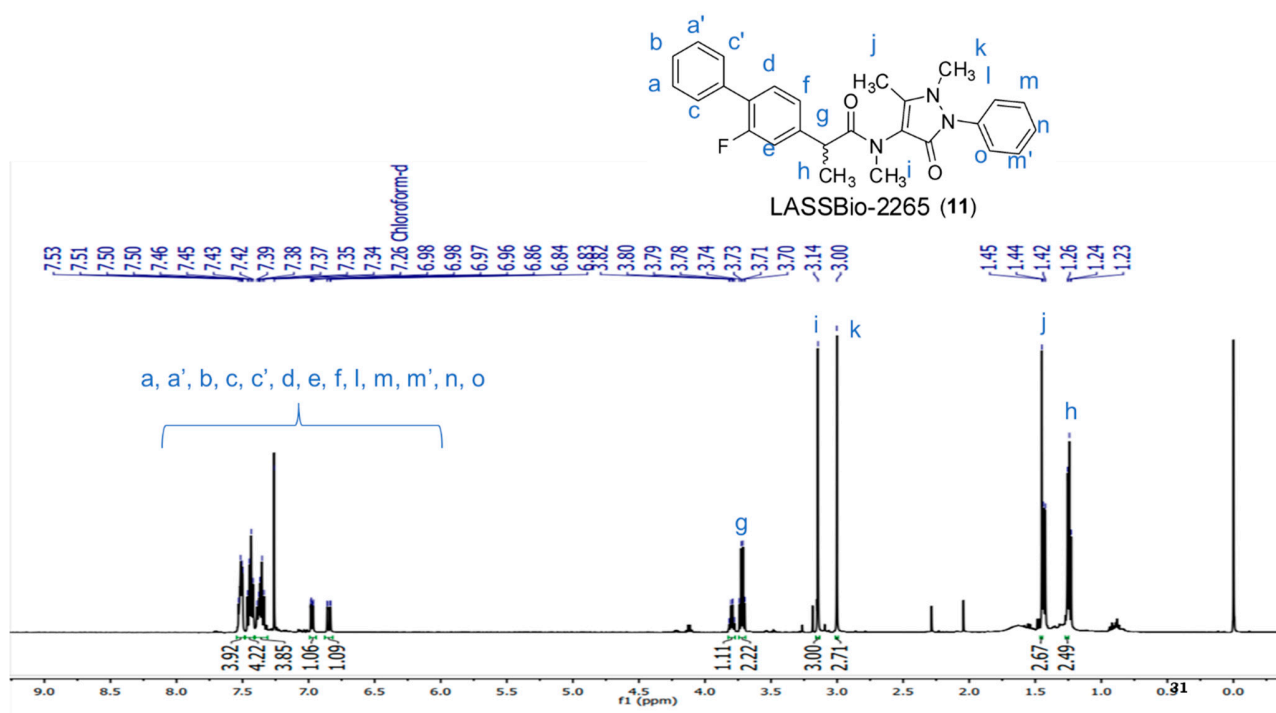

Figure S24. Spectrum of RMN<sup>1</sup>H to LASSBio-2265 (11) (500 MHz, acetonitrile-*d*3).

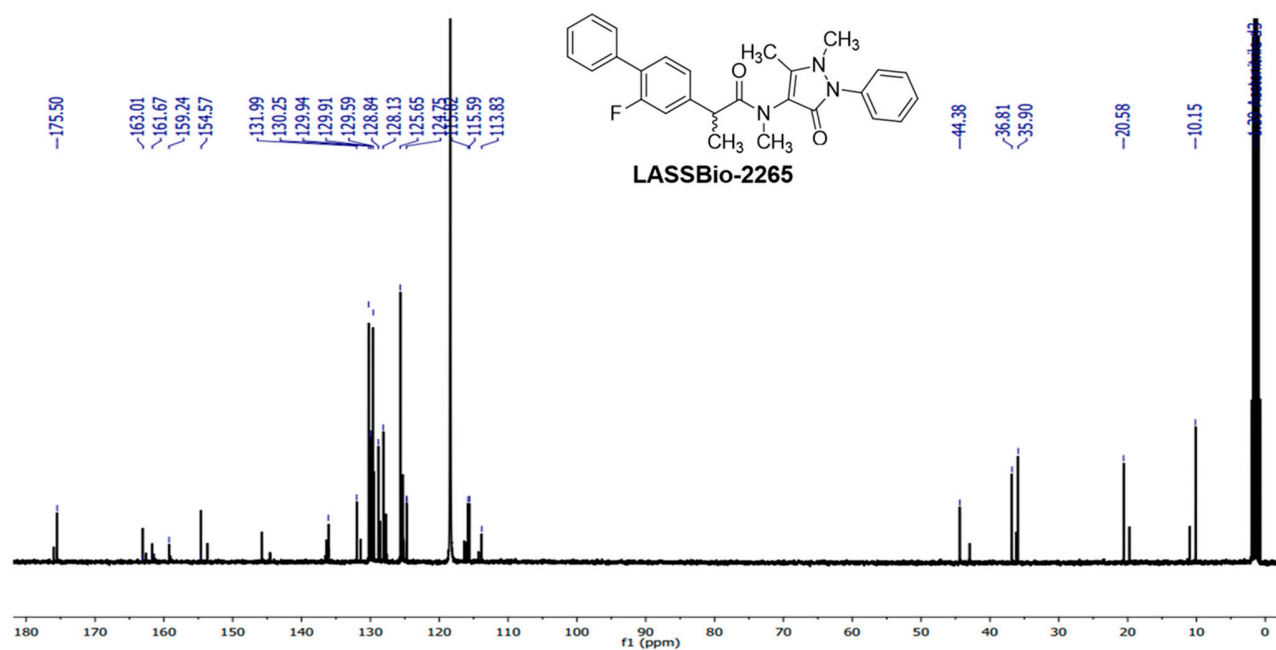

Figure S25. NMR spectrum <sup>13</sup>C of LASSBio-2265 (11) (100 MHz, CDCl<sub>3</sub>).

<Chromatogram>

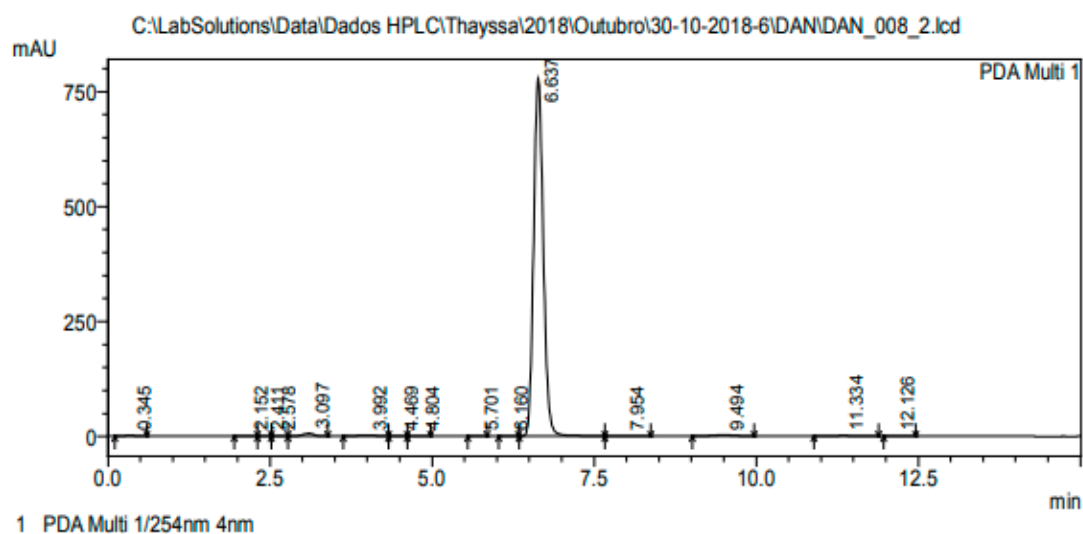

PeakTable

| Peak# | Ret. Time | Area    | Height | Area %  | Height % |
|-------|-----------|---------|--------|---------|----------|
| 1     | 0.345     | 16092   | 1310   | 0.194   | 0.165    |
| 2     | 2.152     | 8175    | 613    | 0.098   | 0.077    |
| 3     | 2.411     | 2178    | 220    | 0.026   | 0.028    |
| 4     | 2.578     | 2817    | 355    | 0.034   | 0.045    |
| 5     | 3.097     | 70327   | 5795   | 0.846   | 0.732    |
| 6     | 3.992     | 32786   | 1689   | 0.394   | 0.213    |
| 7     | 4.469     | 1933    | 131    | 0.023   | 0.017    |
| 8     | 4.804     | 2867    | 344    | 0.034   | 0.043    |
| 9     | 5.701     | 1696    | 201    | 0.020   | 0.025    |
| 10    | 6.160     | 1027    | 105    | 0.012   | 0.013    |
| 11    | 6.637     | 8083227 | 776741 | 97.248  | 98.123   |
| 12    | 7.954     | 11066   | 542    | 0.133   | 0.069    |
| 13    | 9.494     | 55177   | 2446   | 0.664   | 0.309    |
| 14    | 11.334    | 19397   | 888    | 0.233   | 0.112    |
| 15    | 12.126    | 3201    | 224    | 0.039   | 0.028    |
| Total |           | 8311964 | 791603 | 100.000 | 100.000  |

**Figure S26.** Chromatogram obtained for **LASSBio-2265 (11)**. Conditions: Shimadzu – LC20AD; Column: Kromasil 100-5 C18 250-4.6 mm; Mobile phase: 60% ACN, 40% water; Flow: 1mL/min; Detector: SPD-M20A (Diode Array); Wavelength: 254 nm.

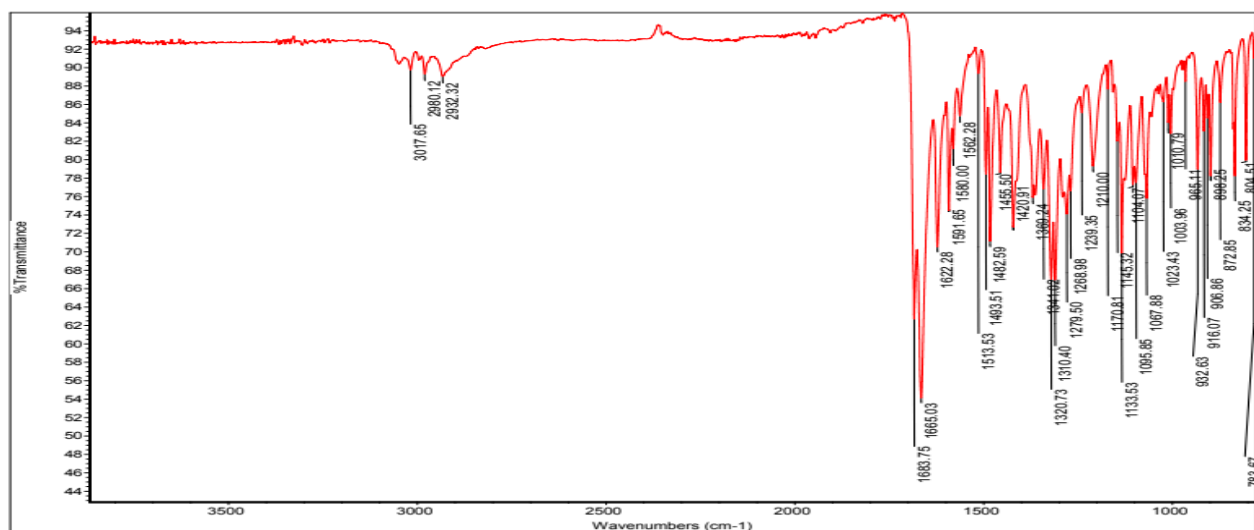

Figure S27. Infrared (ATR) of LASBio-2265 (11).

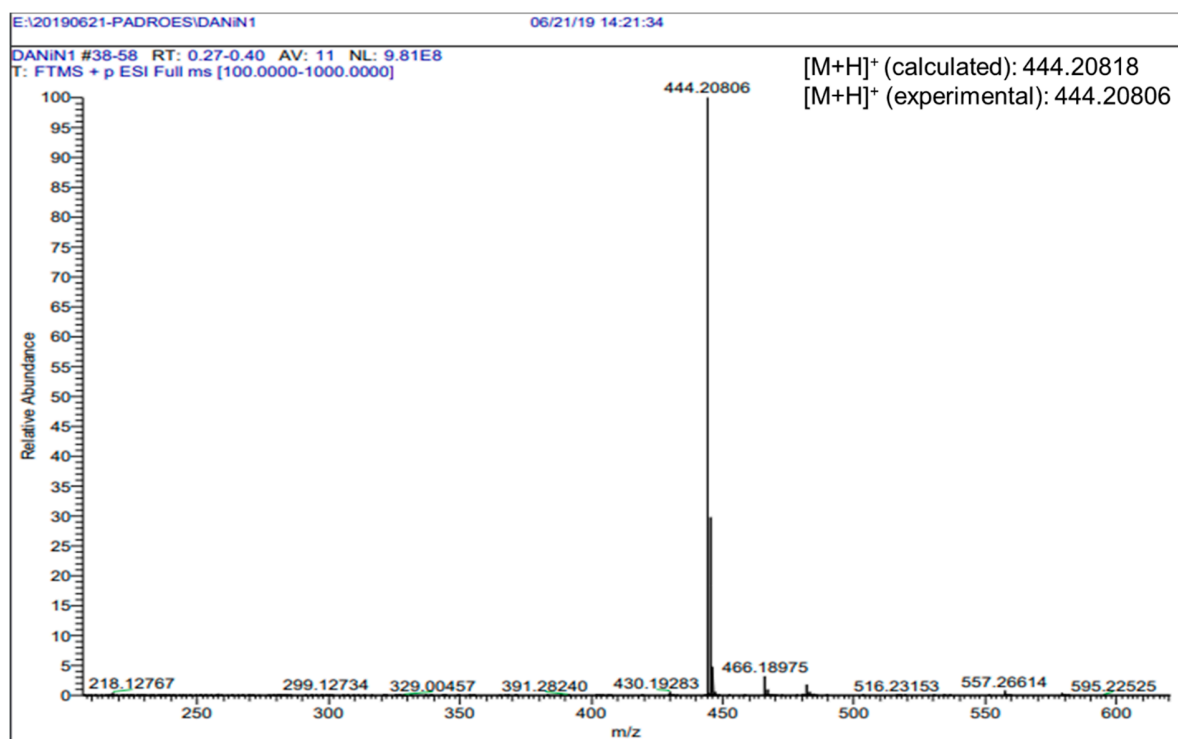

Figure S28. High resolution mass spectrum of LASSBio-2265 (11). Detection in positive mode ( $[M+H]^+$ ).

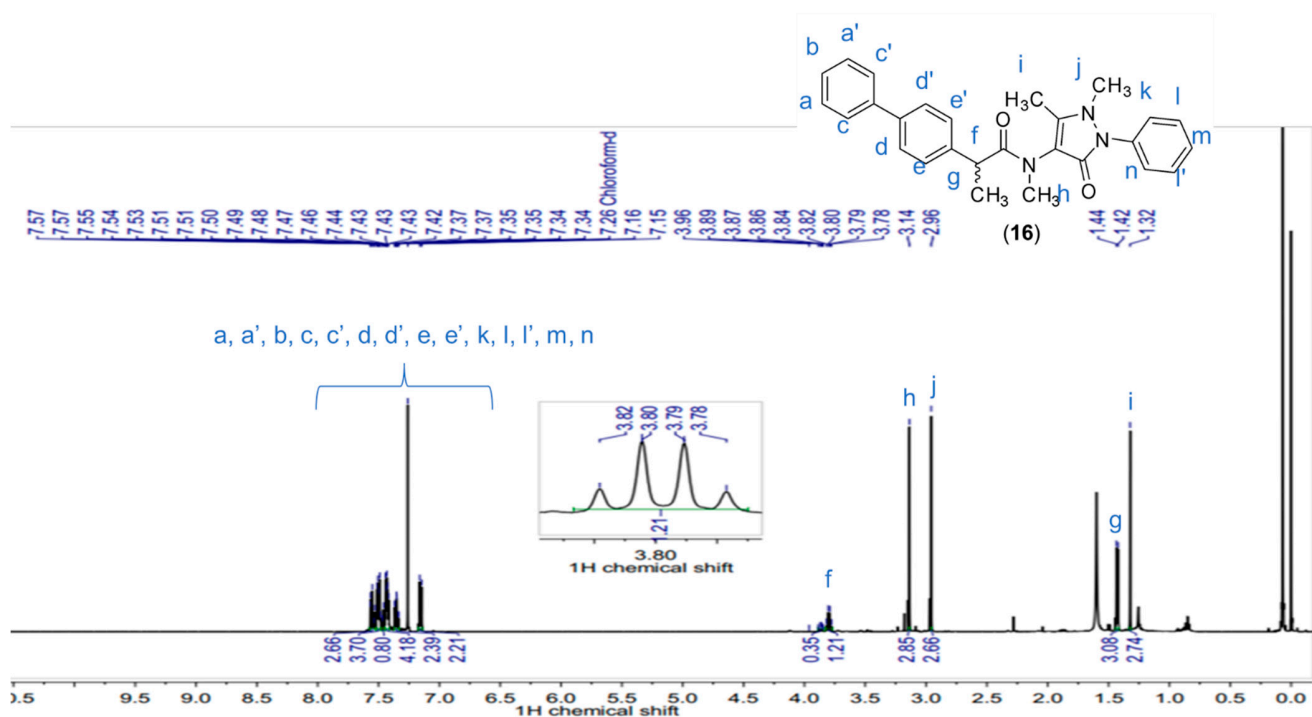

Figure S29. <sup>1</sup>H NMR spectrum of bismethylated pyrazolamide (16) (400 MHz, CDCl<sub>3</sub>).

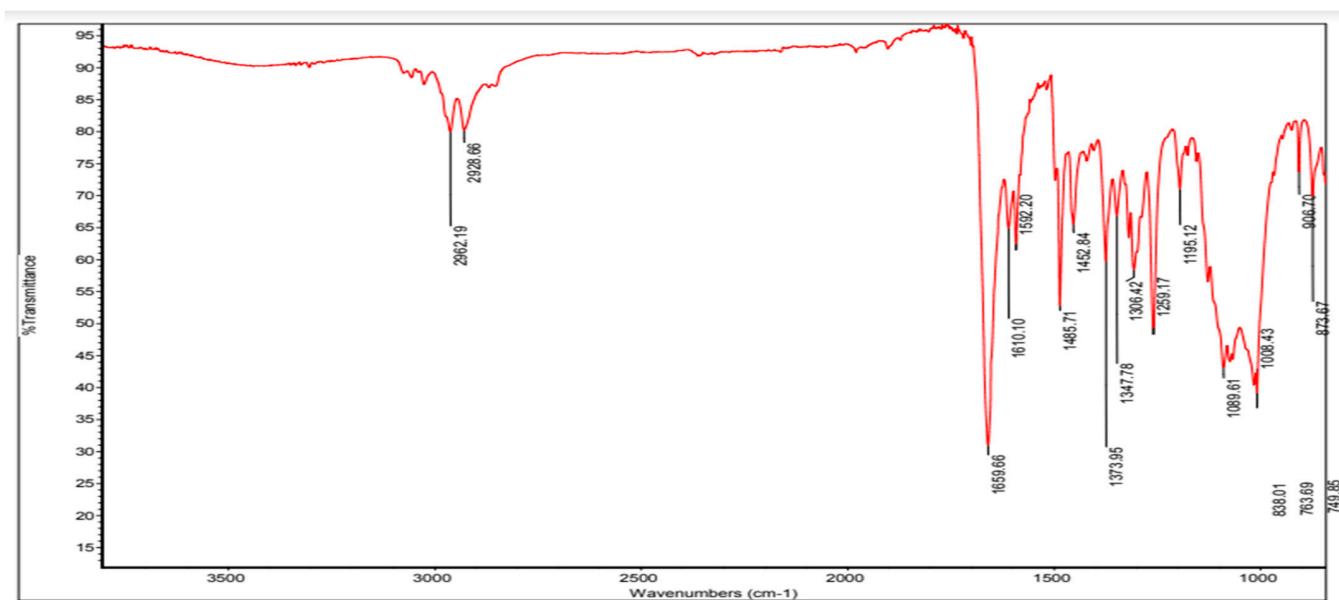

Figure S30. Infrared (ATR) of bismethylated pyrazolamide (16).

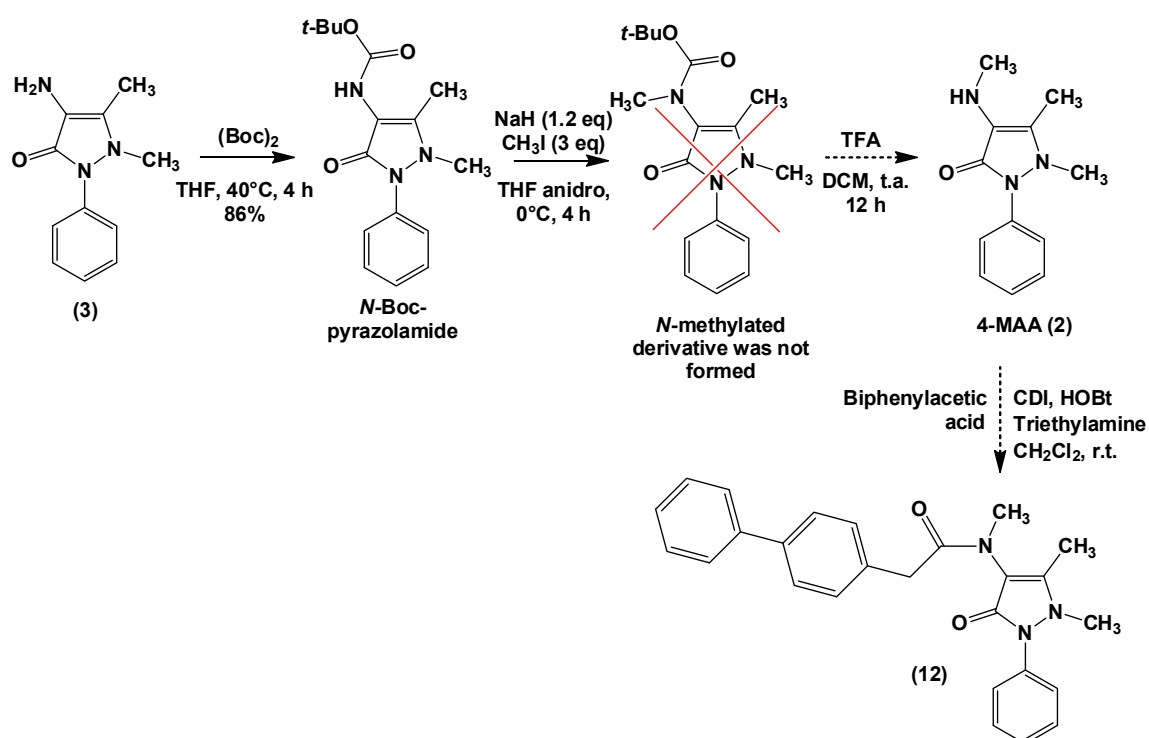

Figure S31. Alternative methodology tried for the synthesis of pyrazolamide (12).

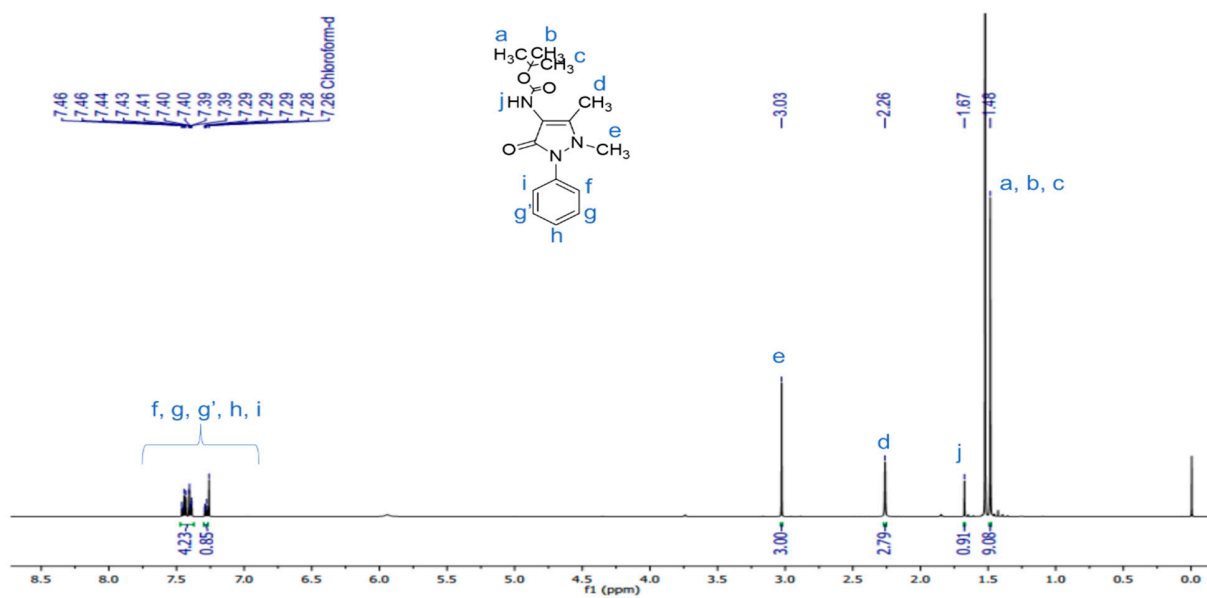

Figure S32.  $^1\text{H}$  NMR spectrum<sup>1</sup> of N-Boc-pyrazolamide (500 MHz,  $\text{CDCl}_3$ ).

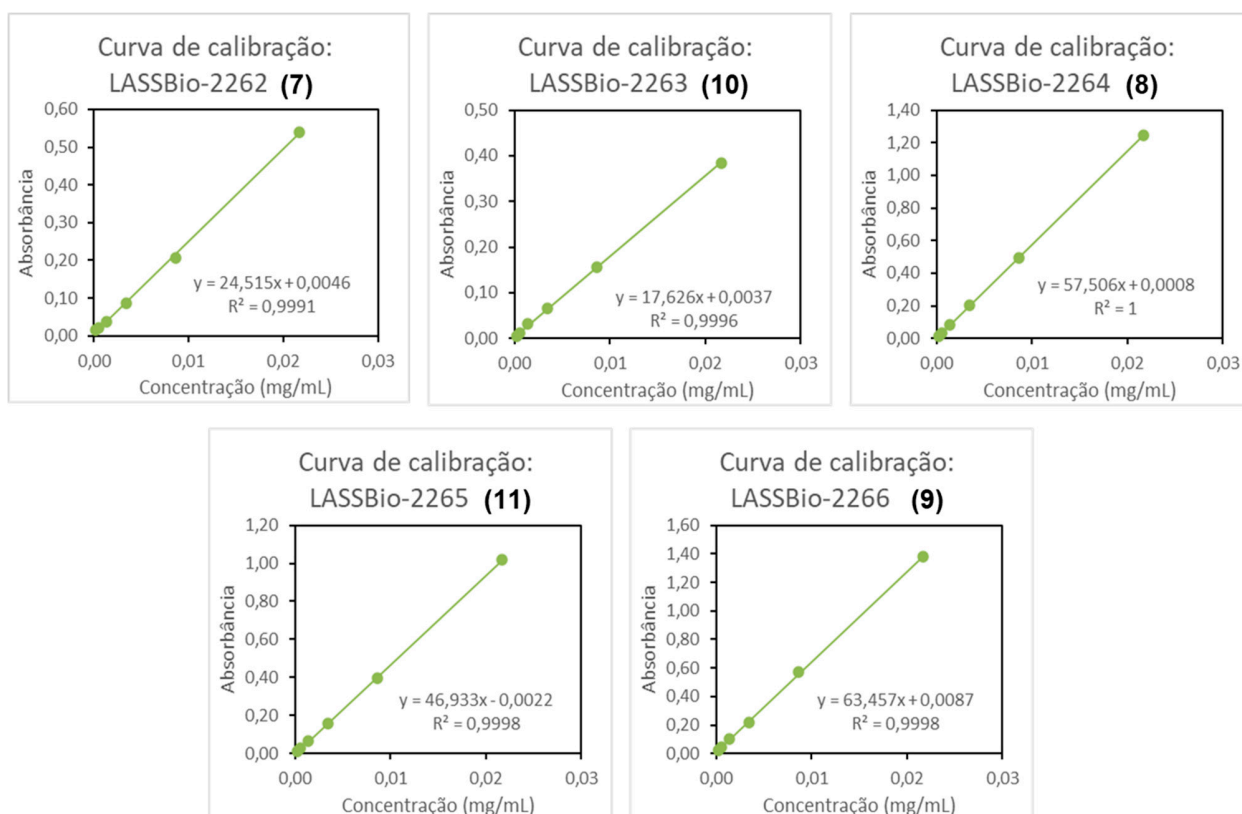

**Figure S33.** Calibration curves for determination of aqueous solubility of the pyrazolamides (7-11).

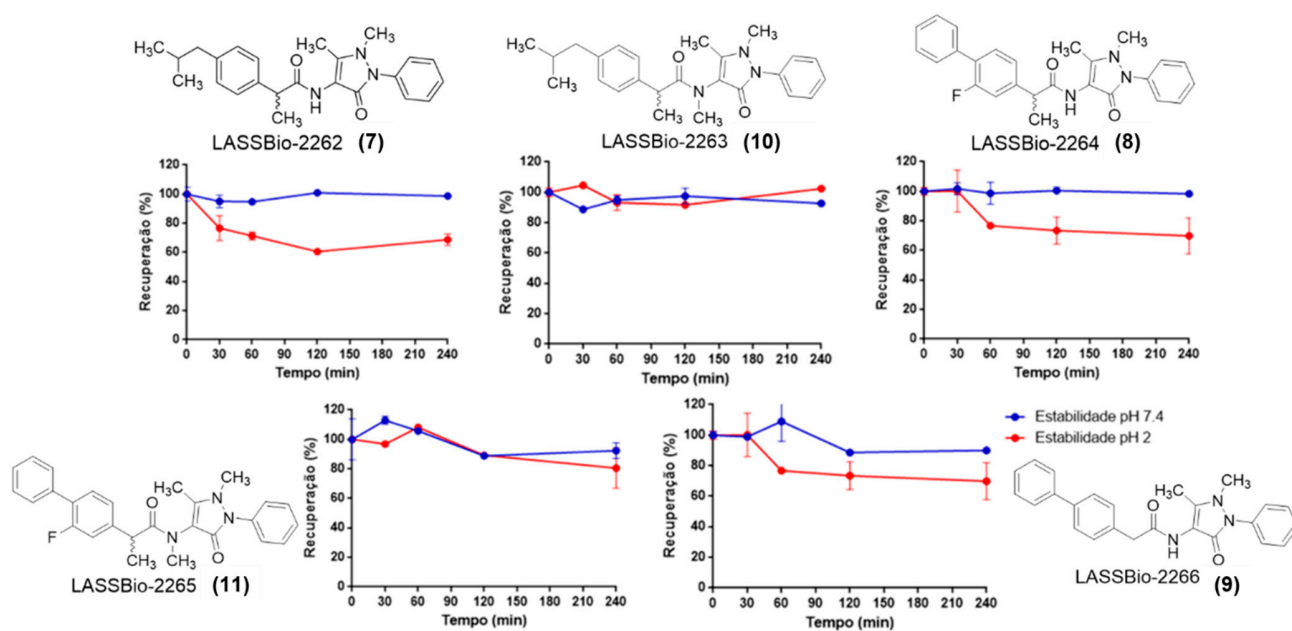

**Figure S34.** Chemical stability of pyrazolamides (7-11) at pH 2 (red) and pH 7.4 (blue). Experiments performed in triplicate. Reading performed in HPLC-PDA (Shimadzu-LC20A; Kromasil C-18 column (4.6mm x 250mm); SPD-M20A detector (Diode Array); flow: 1ml/minute]; Mobile phase: Acetonitrile:water, 40%. Wavelength: 272 nm (LASSBio-2262 (7) and LASSBio-2263 (10)), 247 nm (LASSBio-2264 (8) and LASSBio-2265 (11)) and 253 nm (LASSBio-2266 (9)). The calculations were performed according to the peak area values of the analytes.



**Table S1.** Absorbed fraction of drugs used as standard and pyrazolamides (7-11) determined in the PAMPA-GTI model.

| <b>COMPOUND</b> | <b>Pe** Lit<br/>(10<sup>-6</sup>cm/s)</b> | <b>Pe** Exp<br/>(10<sup>-6</sup> cm/s)</b> | <b>Fa<sup>#</sup><br/>(%)</b> | <b>Classification</b> |
|-----------------|-------------------------------------------|--------------------------------------------|-------------------------------|-----------------------|
| Acyclovir*      | 0,06                                      | 0,08                                       | 2,98                          | LOW                   |
| Atenolol*       | 0,1                                       | 0,11                                       | 4,22                          | LOW                   |
| Ranitidine*     | 0,5                                       | 0,38                                       | 13,48                         | LOW                   |
| Sulfassalazine* | 0,3                                       | 0,45                                       | 15,5                          | LOW                   |
| Aspirin*        | 3,8                                       | 1,69                                       | 47,36                         | AVERAGE               |
| Hydrocortisone* | 3,4                                       | 2,16                                       | 55,93                         | AVERAGE               |
| Prednisone*     | 5,7                                       | 3,09                                       | 69,16                         | AVERAGE               |
| Ketoconazole*   | 3,3                                       | 4,93                                       | 84,68                         | HIGH                  |
| Coumarin*       | 22,9                                      | 22,65                                      | 99,98                         | HIGH                  |
| Diclofenac*     | 12,5                                      | 13,01                                      | 99,28                         | HIGH                  |
| Verapamil*      | 7,4                                       | 6,45                                       | 91,40                         | HIGH                  |
| <b>(7)</b>      | <b>-</b>                                  | <b>15,38</b>                               | <b>99,71</b>                  | <b>HIGH</b>           |
| <b>(10)</b>     | <b>-</b>                                  | <b>9,15</b>                                | <b>96,91</b>                  | <b>HIGH</b>           |
| <b>(8)</b>      | <b>-</b>                                  | <b>9,69</b>                                | <b>97,49</b>                  | <b>HIGH</b>           |
| <b>(11)</b>     | <b>-</b>                                  | <b>10,18</b>                               | <b>97,91</b>                  | <b>HIGH</b>           |
| <b>(9)</b>      | <b>-</b>                                  | <b>11,00</b>                               | <b>98,47</b>                  | <b>HIGH</b>           |

\*Drugs used as standard for experimental validation. \*\*Pe= permeability coefficient; #Fa= absorbed fraction (ZHU et al., 2002).

**Table S2.** Permeability of drugs used as standard, and pyrazolamides (**7-11**) determined in the PAMPA-BBB model.

| <b>Compound</b>     | <b>Pe literatura<br/>(10<sup>-6</sup> cm s<sup>-1</sup>)</b> | <b>Pe experimental<br/>(10<sup>-6</sup> cm s<sup>-1</sup>)</b> | <b>Classification</b> |
|---------------------|--------------------------------------------------------------|----------------------------------------------------------------|-----------------------|
| <b>Atenolol</b>     | <b>0,8</b>                                                   | <b>0,46</b>                                                    | <b>CNS -</b>          |
| <b>Caffeine</b>     | <b>1,3</b>                                                   | <b>0,81</b>                                                    | <b>CNS -</b>          |
| <b>Diazepam</b>     | <b>16</b>                                                    | <b>14,30</b>                                                   | <b>CNS +</b>          |
| <b>Enoxacin</b>     | <b>0,9</b>                                                   | <b>0,53</b>                                                    | <b>CNS -</b>          |
| <b>Ofloxacin</b>    | <b>0,8</b>                                                   | <b>1,29</b>                                                    | <b>CNS -</b>          |
| <b>Testosterone</b> | <b>17</b>                                                    | <b>16,85</b>                                                   | <b>CNS +</b>          |
| <b>Verapamil</b>    | <b>16</b>                                                    | <b>15,40</b>                                                   | <b>CNS +</b>          |
| <b>(7)</b>          | <b>-</b>                                                     | <b>12,77</b>                                                   | <b>CNS +</b>          |
| <b>(10)</b>         | <b>-</b>                                                     | <b>12,68</b>                                                   | <b>CNS +</b>          |
| <b>(8)</b>          | <b>-</b>                                                     | <b>17,25</b>                                                   | <b>CNS +</b>          |
| <b>(11)</b>         | <b>-</b>                                                     | <b>9,26</b>                                                    | <b>CNS +</b>          |
| <b>(9)</b>          | <b>-</b>                                                     | <b>4,51</b>                                                    | <b>CNS +</b>          |

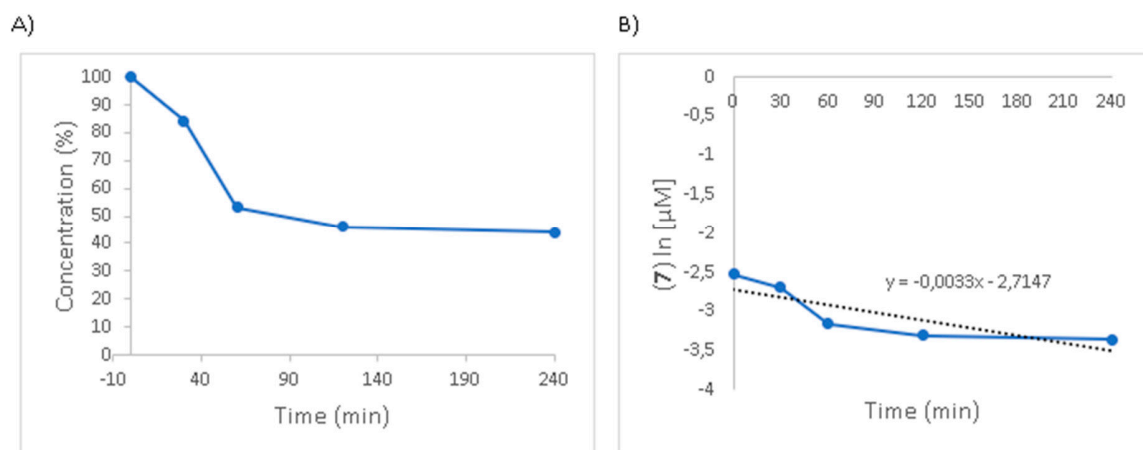

**Figure S35.** A) Plasma stability profile of (7); B) First order rate constant (k) for elimination.

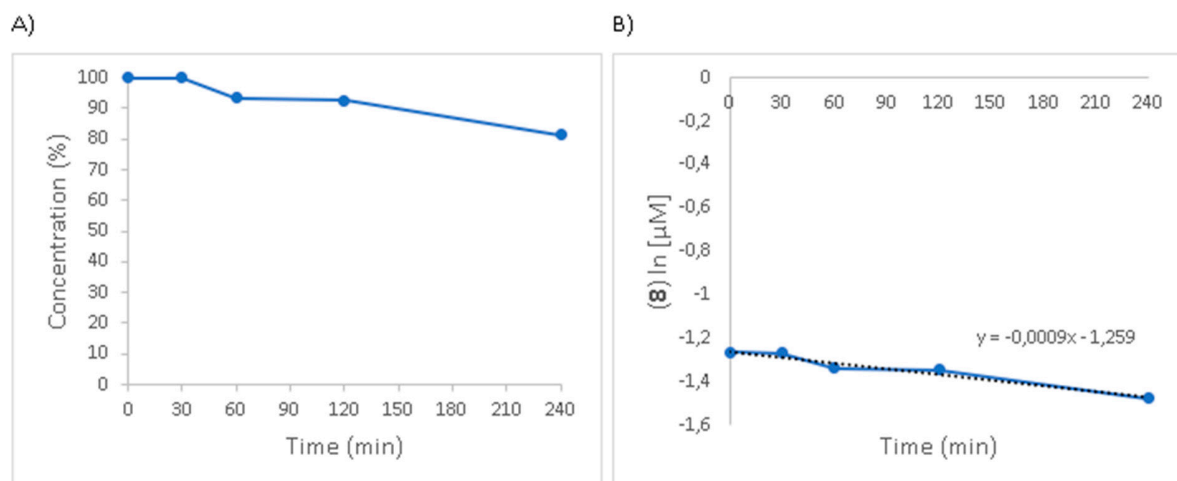

**Figure S36.** A) Plasma stability profile of (8); B) First order rate constant (k) for elimination.

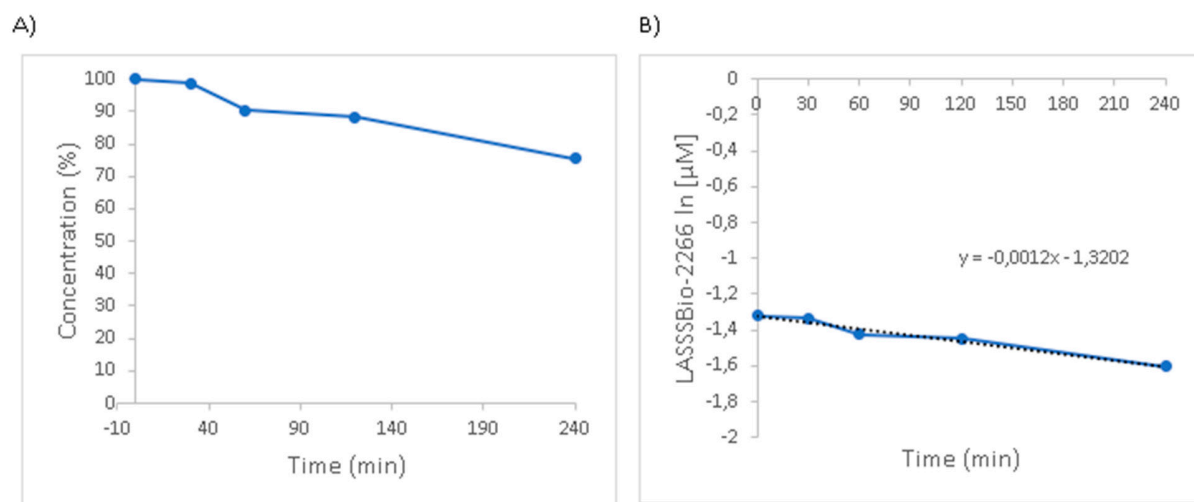

**Figure S37.** A) Plasma stability profile of (9); B) First order rate constant (k) for elimination.

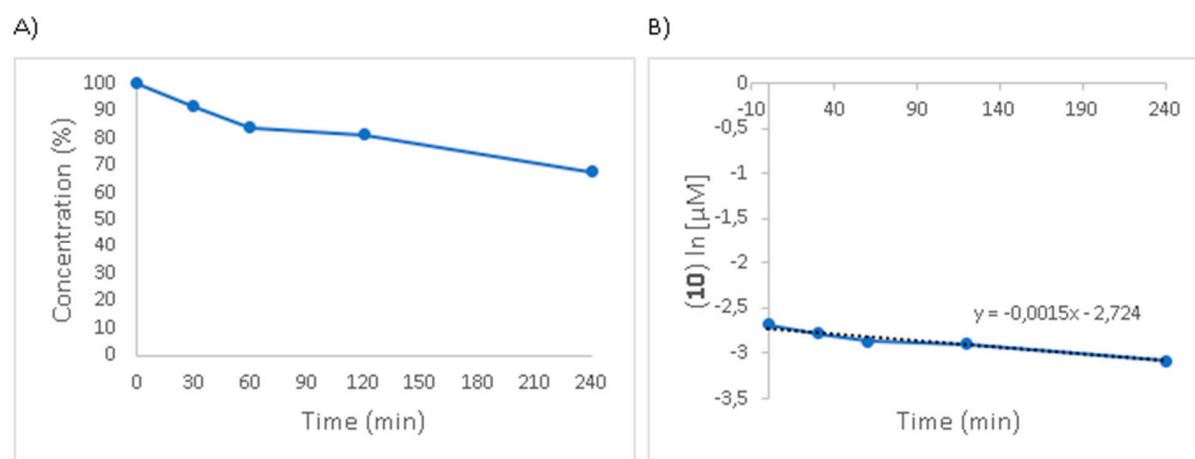

**Figure S38.** A) Plasma stability profile of (10); B) First order rate constant (k) for elimination.

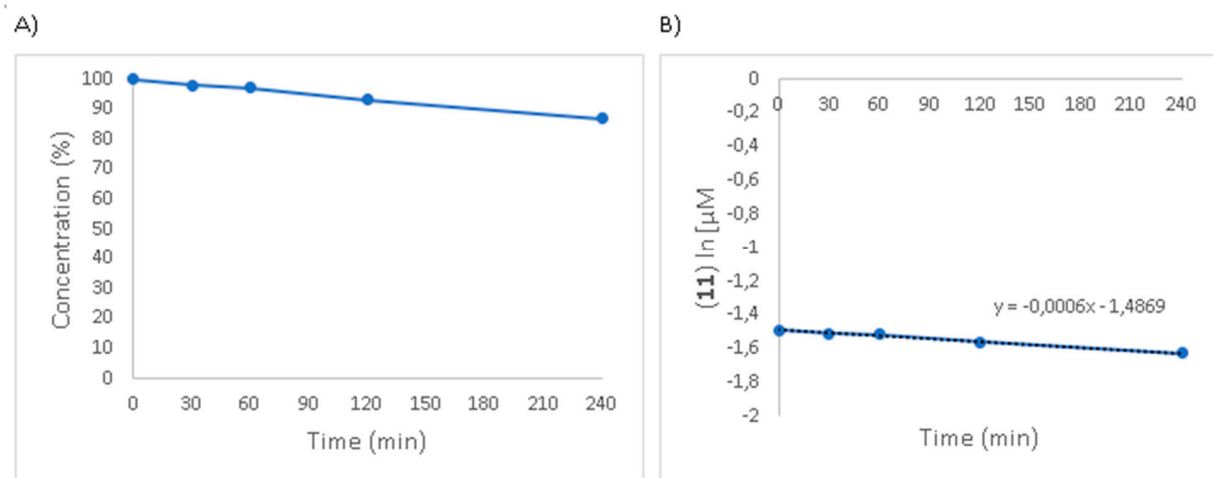

**Figure S39.** A) Plasma stability profile of (11); B) First order rate constant (k) for elimination.

**Table S3.** Evaluation the agonist effect against the CB1 receptors of the pyrazolamides (7-11).

| Compound | % of control agonist*<br>response activity at 1 $\mu\text{M}$ | % of control agonist*<br>response activity at 10 $\mu\text{M}$ |
|----------|---------------------------------------------------------------|----------------------------------------------------------------|
| (7)      | 10.4                                                          | 25.3                                                           |
| (8)      | 6.5                                                           | 14.4                                                           |
| (9)      | 16.9                                                          | 23.6                                                           |
| (10)     | 12.5                                                          | 26.1                                                           |
| (11)     | 6.7                                                           | 4.6                                                            |

\* The control agonist used in the evaluation of agonist activity in CB1 cannabinoid receptors was CP 55,940 ( $\text{EC}_{50} = 3.3\text{E-}11 \text{ M}$ )

**Table S4.** Evaluation the agonist effect against the CB2 receptors of the pyrazolamides (7-11).

| Compound                                                                                                                            | % of control agonis*<br>response activity at 1<br>μM | % of control agonist*<br>response activity at 10<br>μM |
|-------------------------------------------------------------------------------------------------------------------------------------|------------------------------------------------------|--------------------------------------------------------|
| (7)                                                                                                                                 | 0.2                                                  | -78.1                                                  |
| (8)                                                                                                                                 | -12.8                                                | -157.8                                                 |
| (9)                                                                                                                                 | -1.1                                                 | -41.5                                                  |
| (10)                                                                                                                                | -18.6                                                | -102.8                                                 |
| (11)                                                                                                                                | -69.8                                                | -119.6                                                 |
| * The control agonist used in the evaluation of agonist activity in CB2<br>cannabinoid receptors was WIN 55212-2 (EC50 = 2.4E-10 M) |                                                      |                                                        |

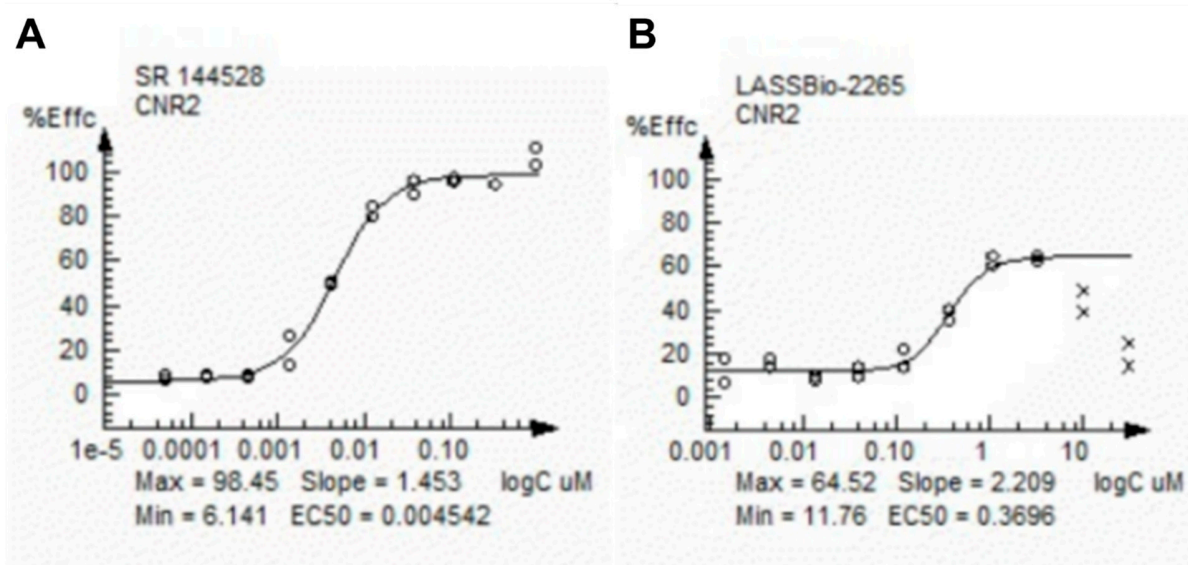

**Figure S40.** Dose-response curve of inverse agonism for cannabinoid receptor 2 (CB2) performed by the company Eurofins-CEREP: (A) control inverse agonist SR 144528 and (B) LASSBio-2265 (11).

**Table S5.** Raw data from the inverse agonism assay performed by the company Eurofins-CEREP

| Compound Name | Assay Format    | RC50        | Unit | Hill   | Curve Bottom | Curve Top | Max Response |
|---------------|-----------------|-------------|------|--------|--------------|-----------|--------------|
| CP55940       | Agonist         | 0.001022727 | uM   | 1.3517 | -5.1253      | 100       | 102.06       |
| SR 144528     | Inverse Agonist | 0.004542448 | uM   | 1.4529 | 6.1415       | 98.455    | 106.31       |
| LASSBio-2265  | Inverse Agonist | 0.3695975   | uM   | 2.209  | 11.761       | 64.52     | 63.063       |
